# Supplementary material for: Direct α-C-H amination of β-dicarbonyl compounds using DBU-activated N-haloimides as nitrogen sources
Source: Royal Society of Chemistry journal article supplement (doi:10.1039/c4ra07118b), 2014-07-28

**Direct  $\alpha$ -C-H amination of  $\beta$ -dicarbonyl compounds using DBU-activated  
*N*-haloimides as nitrogen sources**

Hui Tan,<sup>a</sup> Mengru Li,<sup>a</sup> and Fushun Liang,<sup>\*,a,b</sup>

<sup>a</sup> *Department of Chemistry, Northeast Normal University, Changchun 130024, China*

<sup>b</sup> *Key Laboratory for UV-Emitting Materials and Technology of Ministry of Education, Northeast Normal University, Changchun 130024, China*

*liangfs112@nenu.edu.cn*

**Table of contents**

|                                                                                                 |           |
|-------------------------------------------------------------------------------------------------|-----------|
| <b>I. General .....</b>                                                                         | <b>S2</b> |
| <b>II. Synthesis and analytical data of 2-4 and 6.....</b>                                      | <b>S2</b> |
| <b>III. Copies of <sup>1</sup>H and <sup>13</sup>C NMR spectra for compounds 2-4 and 6.....</b> | <b>S9</b> |

## I. General

All reagents were purchased from commercial sources and used without treatment, unless otherwise indicated. The products were purified by column chromatography over silica gel.  $^1\text{H}$  NMR and  $^{13}\text{C}$  NMR spectra were recorded at 25 °C on a Varian 500 MHz and 125 MHz, respectively, and TMS as internal standard. High resolution mass spectra (HRMS) were recorded on Bruker microTof by using ESI method.

## II. Synthesis and analytical data of 2-4 and 6

General procedure for the preparation of **2** (**2a** and **2a'** as an example): To a solution of ethyl 3-oxobutanoate **1a** (0.128 mL, 1.0 mmol) in MeCN (2.0 mL) was added NBP (339.0 mg, 1.5 mmol) and DBU (0.261 mL, 1.8 mmol). The mixture was stirred at room temperature for 20 min. The reaction mixture was poured into water and then extracted with  $\text{CH}_2\text{Cl}_2$  ( $3 \times 10$  mL). The combined organic phase was washed with water ( $3 \times 10$  mL), filtered and concentrated under reduced pressure. The crude product was purified by flash chromatography (silica gel, petroleum ether : ethyl acetate = 80 : 3 as eluent) to give **2a** and **2a'** (245.0 mg, 89%) as colorless oil.

### Ethyl 2-(1, 3-dioxoisindolin-2-yl)-3-oxobutanoate (**2a**) and ethyl 2-(1, 3-dioxoisindolin-2-yl)-3-hydroxybut-2-enoate (**2a'**)

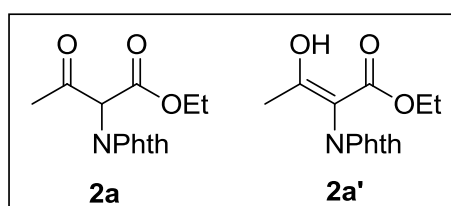

Colorless oil. mixture ketone/enol form 1/4.3.  $^1\text{H}$  NMR (500 MHz,  $\text{CDCl}_3$ ):  $\delta$  = 1.17 (t,  $J$  = 7.0 Hz, 3H, enol form), 1.31 (t,  $J$  = 7.0 Hz, 3H, ketone form), 1.97 (s, 1H, enol form), 2.48 (s, 3H, ketone form), 4.17-4.22 (m, 2H, enol form), 4.31 (t,  $J$  = 7.5 Hz, 3H, ketone form), 7.78-7.79 (m, 2H, ketone form), 7.80-7.82 (m, 2H, enol form), 7.90-7.93 (m, 2H, ketone form), 7.94 (t,  $J$  = 2.8 Hz, enol form), 12.78 (s, 1H, enol form);  $^{13}\text{C}$  NMR ( $\text{CDCl}_3$ , 125 MHz):  $\delta$  = 13.8, 13.9, 17.9, 28.3, 60.6, 61.2, 62.5, 96.1, 123.6, 123.6, 131.5, 131.7, 134.2, 164.7, 166.6, 167.2, 169.0, 176.7, 196.3; HRMS

(ESI) m/z calcd for C<sub>14</sub>H<sub>13</sub>NO<sub>5</sub> [M+H]<sup>+</sup>: 276.0872; found: 276.0881.

**Ethyl 2-(1,3-dioxisoindolin-2-yl)-3-oxopentanoate (2b) and ethyl 2-(1,3-dioxisoindolin-2-yl)-3-hydroxypent-2-enoate (2b')**

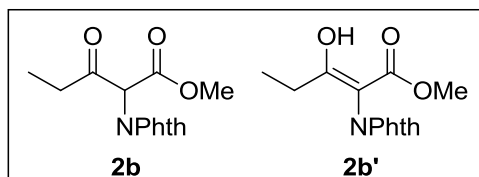

Colorless oil. mixture ketone/enol form 1/3. <sup>1</sup>H NMR (500 MHz, CDCl<sub>3</sub>): δ = 1.17 (t, *J* = 6.0 Hz, 6H, ketone form and enol form), 2.22-2.26 (m, 2H, enol form), 2.67-2.73 (m, 1H, ketone form), 2.86-2.92 (m, 1H, ketone form), 3.71 (s, 3H, enol form), 3.84 (s, 3H, ketone form), 5.48 (s, 1H, ketone form), 7.77-7.82 (m, 4H, ketone form and enol form), 7.90-7.92 (m, 2H, ketone form); 7.94 (t, *J* = 2.8 Hz, 2H, enol form), 12.81 (s, 1H, enol form); <sup>13</sup>C NMR (CDCl<sub>3</sub>, 125 MHz): δ = 7.3, 10.0, 24.5, 33.9, 52.0, 52.9, 59.7, 94.8, 123.5, 131.4, 131.5, 134.2, 134.2, 165.5, 166.5, 167.3, 169.4, 180.7, 199.2; HRMS (ESI) m/z calcd for C<sub>14</sub>H<sub>13</sub>NO<sub>5</sub> [M+H]<sup>+</sup>: 276.0872; found: 276.0878.

**Ethyl 2-(1,3-dioxisoindolin-2-yl)-3-oxo-3-phenylpropanoate (2c) and ethyl 2-(1,3-dioxisoindolin-2-yl)-3-hydroxy-3-phenylacrylate (2c')**

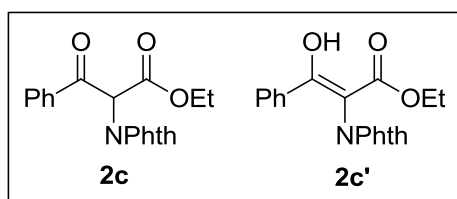

Colorless oil. mixture ketone/enol form 1.3/1. <sup>1</sup>H NMR (500 MHz, CDCl<sub>3</sub>): δ = 1.21 (t, *J* = 13.0 Hz, 3H, enol form), 1.28 (t, *J* = 7.0 Hz, 3H, ketone form), 4.23-4.30 (m, 2H, enol form), 4.31-4.35 (m, 2H, ketone form), 6.32 (s, 1H, ketone form), 7.28 (t, *J* = 7.3 Hz, 2H, ketone form), 7.35 (t, *J* = 7.5 Hz, 1H, enol form), 7.45-7.51 (m, 3H, ketone form), 7.58 (t, *J* = 7.5 Hz, 1H, ketone form), 7.73-7.77 (m, 5H, enol form), 7.85 (t, *J* = 2.5 Hz, 3H, enol form), 7.86-7.91 (m, 3H, ketone form), 13.19 (s, 1H, enol form); <sup>13</sup>C NMR (CDCl<sub>3</sub>, 125 MHz): δ = 13.6, 13.7, 57.0, 61.5, 62.3, 95.6, 123.4,

123.4, 126.8, 128.0, 128.1, 128.5, 130.7, 131.2, 131.3, 132.1, 133.5, 134.1, 134.2, 134.6, 165.2, 166.4, 167.4, 169.7, 174.4, 189.2; HRMS (ESI)  $m/z$  calcd for  $C_{19}H_{15}NO_5$   $[M+H]^+$ : 338.1028; found: 338.1022.

**2-(1, 3-Dioxoisindolin-2-yl)-*N*-methyl-3-oxo-*N*-phenylbutanamide (2d) and 2-(1, 3-dioxoisindolin-2-yl)-3-hydroxy-*N*-methyl-*N*-phenylbut-2-enamide (2d')**

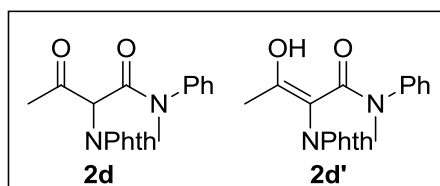

Colorless oil. mixture ketone/enol form 1/1.7.  $^1H$  NMR (500 MHz,  $CDCl_3$ ):  $\delta$  = 1.67 (s, 3H, enol form), 2.21 (s, 3H, ketone form), 3.26 (s, 3H, enol form), 3.34 (s, 3H, ketone form), 5.45 (s, 1H, ketone form), 6.61 (d,  $J$  = 7.5 Hz, 1H, enol form), 6.88 (t,  $J$  = 7.8 Hz, 2H, enol form), 6.97 (d,  $J$  = 7.5 Hz, 2H, enol form), 7.25 (t,  $J$  = 10.0 Hz, 2H, ketone form), 7.32 (t,  $J$  = 7.0 Hz, 3H, ketone form), 7.55-7.61 (m, 4H, enol form), 7.73-7.75 (m, 2H, ketone form), 7.81-7.83 (m, 2H, ketone form), 15.80 (s, 1H, enol form);  $^{13}C$  NMR ( $CDCl_3$ , 125 MHz):  $\delta$  = 18.3, 27.6, 37.6, 39.7, 59.9, 95.4, 122.5, 123.2, 125.5, 126.5, 128.1, 128.9, 129.5, 130.9, 131.1, 133.5, 134.1, 141.7, 142.2, 164.0, 166.4, 166.6, 168.7, 178.0, 197.6; HRMS (ESI)  $m/z$  calcd for  $C_{19}H_{16}N_2O_4$   $[M+H]^+$ : 337.1188; found: 337.1181.

**2-(1, 3-Dioxoisindolin-2-yl)-*N*, *N*-dimethyl-3-oxobutanamide (2e)**

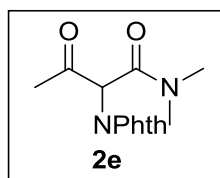

White solid. m.p. 130-132 °C.  $^1H$  NMR (500 MHz,  $CDCl_3$ ):  $\delta$  = 2.35 (s, 3H), 2.98 (s, 3H), 3.03 (s, 3H), 5.62 (s, 1H), 7.77-7.79 (m, 2H), 7.90-7.92 (m, 2H);  $^{13}C$  NMR ( $CDCl_3$ , 125 MHz):  $\delta$  = 28.0, 36.0, 37.2, 60.4, 123.8, 131.7, 134.5, 164.0, 167.3, 197.8; HRMS (ESI)  $m/z$  calcd for  $C_{14}H_{14}N_2O_4$   $[M+H]^+$ : 275.1023; found: 275.1029.

### 2-(2-Hydroxy-4-oxopent-2-en-3-yl)isoindoline-1, 3-dione (2f')

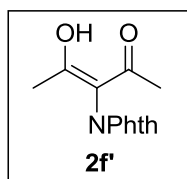

White solid. m.p. 114-116 °C.  $^1\text{H}$  NMR (500 MHz,  $\text{CDCl}_3$ ):  $\delta$  = 2.00 (s, 6H), 7.84-7.85 (m, 2H), 7.96-7.98 (m, 2H), 16.23 (s, 1H);  $^{13}\text{C}$  NMR ( $\text{CDCl}_3$ , 125 MHz):  $\delta$  = 21.8, 106.4, 124.0, 131.5, 134.7, 167.4, 191.1; HRMS (ESI)  $m/z$  calcd for  $\text{C}_{13}\text{H}_{11}\text{NO}_4$   $[\text{M}+\text{H}]^+$ : 246.0766, found 246.0761.

### Diethyl 2-(1, 3-dioxoisindolin-2-yl)malonate (2g)

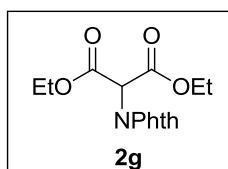

White solid. m.p. 52-54 °C.  $^1\text{H}$  NMR (500 MHz,  $\text{CDCl}_3$ ):  $\delta$  = 1.32 (t,  $J$  = 7.5 Hz, 6H), 4.27-4.38 (m, 4H), 5.49 (s, 1H), 7.77-7.80 (m, 2H), 7.90-7.92 (m, 2H);  $^{13}\text{C}$  NMR ( $\text{CDCl}_3$ , 125 MHz):  $\delta$  = 13.9, 54.4, 62.8, 123.8, 131.7, 134.4, 164.3, 166.5; HRMS (ESI)  $m/z$  calcd for  $\text{C}_{15}\text{H}_{15}\text{NO}_6$   $[\text{M}+\text{H}]^+$ : 306.0978; found: 306.0969.

### Dibenzyl 2-(1,3-dioxo-2, 3-dihydro-1*H*-inden-2-yl)malonate (2h)

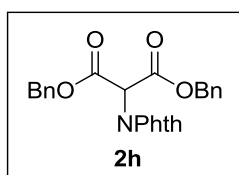

White solid. m.p. 101-103 °C.  $^1\text{H}$  NMR (500 MHz,  $\text{CDCl}_3$ ):  $\delta$  = 5.21-5.28 (m, 4H), 5.60 (s, 1H), 7.31 (s, 10H), 7.75 (t,  $J$  = 4.2 Hz, 2H), 7.88 (t,  $J$  = 3.8 Hz, 2H);  $^{13}\text{C}$  NMR ( $\text{CDCl}_3$ , 125 MHz):  $\delta$  = 54.4, 68.4, 123.5, 123.8, 128.3, 128.4, 128.5, 131.6, 134.2, 134.4, 134.5, 164.1, 166.4; HRMS (ESI)  $m/z$  calcd for  $\text{C}_{25}\text{H}_{19}\text{NO}_6$   $[\text{M}+\text{H}]^+$ : 430.1291; found: 430.1298.

### Ethyl 2-(2,5-dioxopyrrolidin-1-yl)-3-oxobutanoate (3a) and ethyl 2-(2,5-

**dioxopyrrolidin-1-yl)-3-oxobutanoatec (3a')**

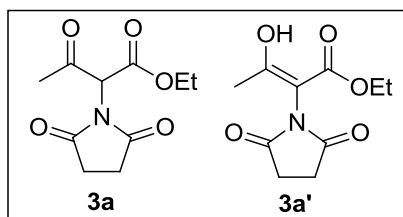

Yellow oil. mixture ketone/enol form 1.2/1.7.  $^1\text{H}$  NMR (500 MHz,  $\text{CDCl}_3$ ):  $\delta$  = 1.23 (t,  $J$  = 7.0 Hz, 3H, enol form), 1.31 (t,  $J$  = 7.2 Hz, 3H, ketone form), 1.90 (s, 3H, enol form), 2.44 (s, 1H, ketone form), 2.79-2.89 (m, 8H, ketone form and enol form), 4.18-4.23 (m, 2H, enol form), 4.28-4.32 (m, 2H, ketone form), 5.28 (s, 1H, ketone form), 12.66 (s, 1H, enol form);  $^{13}\text{C}$  NMR ( $\text{CDCl}_3$ , 125 MHz):  $\delta$  = 13.8, 13.9, 17.7, 28.0, 18.1, 28.5, 61.0, 61.3, 62.6, 96.8, 164.3, 168.3, 175.5, 175.8, 176.0, 195.6; HRMS (ESI)  $m/z$  calcd for  $\text{C}_{10}\text{H}_{13}\text{NO}_5$   $[\text{M}+\text{H}]^+$ : 228.0872; found: 228.0880.

**Methyl 2-(2,5-dioxopyrrolidin-1-yl)-3-oxopentanoate (3b) and methyl 2-(2,5-dioxopyrrolidin-1-yl)-3-hydroxypent-2-enoate (3b')**

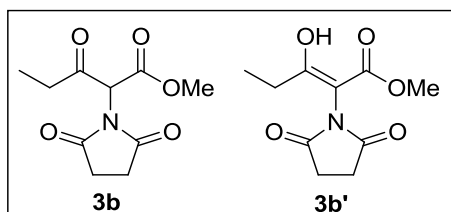

Yellow oil. mixture ketone/enol form 1.49/1.56.  $^1\text{H}$  NMR (500 MHz,  $\text{CDCl}_3$ ):  $\delta$  = 1.11-1.14 (m, 6H, ketone form and enol form), 2.12 (d,  $J$  = 7.5 Hz, 2H, ketone form), 2.16 (t,  $J$  = 7 Hz, 2H, enol form), 2.79-2.91 (m, 8H, ketone form and enol form), 3.73 (s, 3H, ketone form), 3.82 (s, 3H, enol form), 5.30 (s, 1H, ketone form), 12.70 (s, 1H, enol form);  $^{13}\text{C}$  NMR ( $\text{CDCl}_3$ , 125 MHz):  $\delta$  = 7.2, 9.8, 24.2, 27.9, 33.9, 52.0, 52.8, 60.0, 95.4, 164.9, 168.8, 175.5, 176.1, 179.7, 198.6; HRMS (ESI)  $m/z$  calcd for  $\text{C}_{10}\text{H}_{13}\text{NO}_5$   $[\text{M}+\text{H}]^+$ : 228.0872; found: 228.0891.

**Ethyl 2-(2,5-dioxopyrrolidin-1-yl)-3-oxo-3-phenylpropanoate (3c)**

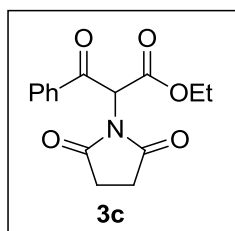

White solid. m.p. 80-82 °C.  $^1\text{H}$  NMR (500 MHz,  $\text{CDCl}_3$ ):  $\delta$  = 1.20 (t,  $J$  = 6.8 Hz, 3H), 2.79 (s, 4H), 4.22-4.26 (m, 2H), 6.15 (s, 1H), 7.45 (t,  $J$  = 7.3 Hz, 2H), 7.58 (t,  $J$  = 6.8 Hz, 1H), 8.84 (d,  $J$  = 7.5 Hz, 2H);  $^{13}\text{C}$  NMR ( $\text{CDCl}_3$ , 125 MHz):  $\delta$  = 13.8, 28.2, 57.7, 62.6, 128.2, 128.7, 133.8, 135.0, 164.9, 175.7, 188.9; HRMS (ESI)  $m/z$  calcd for  $\text{C}_{15}\text{H}_{15}\text{NO}_5$   $[\text{M}+\text{H}]^+$ : 290.1028; found: 290.1020.

**Ethyl 2-(1,1-dioxido-3-oxobenzodisothiazol-2(3H)-yl)-3-hydroxybut-2-enoate (4)**

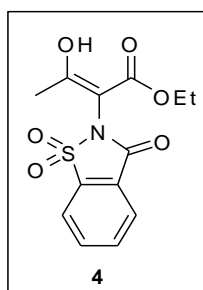

White solid. m.p. 91-93 °C.  $^1\text{H}$  NMR (500 MHz,  $\text{CDCl}_3$ ):  $\delta$  = 1.19 (t,  $J$  = 7.0 Hz, 3H), 2.17 (s, 3H), 4.18-4.23 (m, 1H), 4.24-4.29 (m, 1H), 7.90 (t,  $J$  = 7.5 Hz, 1H), 7.94 (t,  $J$  = 7.5 Hz, 1H), 7.99 (d,  $J$  = 8.0 Hz, 1H), 8.14 (d,  $J$  = 7.5 Hz, 1H), 13.22 (s, 1H);  $^{13}\text{C}$  NMR ( $\text{CDCl}_3$ , 125 MHz):  $\delta$  = 13.9, 18.6, 61.7, 93.0, 121.4, 125.6, 126.8, 134.4, 135.2, 137.8, 158.6, 169.3, 181.6; HRMS (ESI)  $m/z$  calcd for  $\text{C}_{13}\text{H}_{13}\text{NO}_6\text{S}$   $[\text{M}+\text{H}]^+$ : 312.0542; found: 312.0549.

**Ethyl 2-(1,3-dioxoisindolin-2-yl)-2-phenylacetate (6a)**

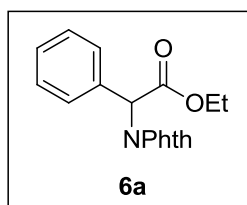

White solid. m.p. 76-78 °C. <sup>1</sup>H NMR (500 MHz, CDCl<sub>3</sub>): δ = 1.26 (t, *J* = 7.3, 3H), 4.28-4.32 (m, 2H), 6.01 (s, 1H), 7.33-7.38 (m, 3H), 7.55 (d, *J* = 7.0 Hz, 2H), 7.71-7.73 (m, 2H), 7.84-7.86 (m, 2H); <sup>13</sup>C NMR (CDCl<sub>3</sub>, 125 MHz): δ = 14.1, 55.8, 62.2, 123.5, 128.5, 128.5, 129.7, 131.7, 134.2, 134.5, 167.1, 167.9; HRMS (ESI) *m/z* calcd for C<sub>18</sub>H<sub>15</sub>NO<sub>4</sub> [M+H]<sup>+</sup>: 310.1079; found: 310.1071.

**Ethyl 2-(4-bromophenyl)-2-(1,3-dioxoisindolin-2-yl)acetate (6b)**

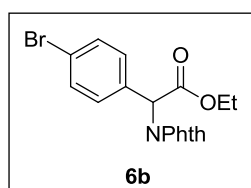

Colorless oil. <sup>1</sup>H NMR (500 MHz, CDCl<sub>3</sub>): δ = 1.25 (t, *J* = 7.0 Hz, 3H), 4.27-4.31 (m, 2H), 5.95 (s, 1H), 7.3 (d, *J* = 9.0 Hz, 2H), 7.48 (d, *J* = 8.5 Hz, 2H), 7.72-7.75 (m, 2H), 7.85-7.86 (m, 2H); <sup>13</sup>C NMR (CDCl<sub>3</sub>, 125 MHz): δ = 14.0, 55.1, 62.4, 122.8, 123.6, 131.4, 131.6, 133.5, 134.3, 167.0, 167.5; HRMS (ESI) *m/z* calcd for C<sub>18</sub>H<sub>14</sub>BrNO<sub>4</sub> [M+H]<sup>+</sup>: 388.0184; found: 388.0178.



### III. Copies of $^1\text{H}$ and $^{13}\text{C}$ NMR spectra for compounds 2a and 6

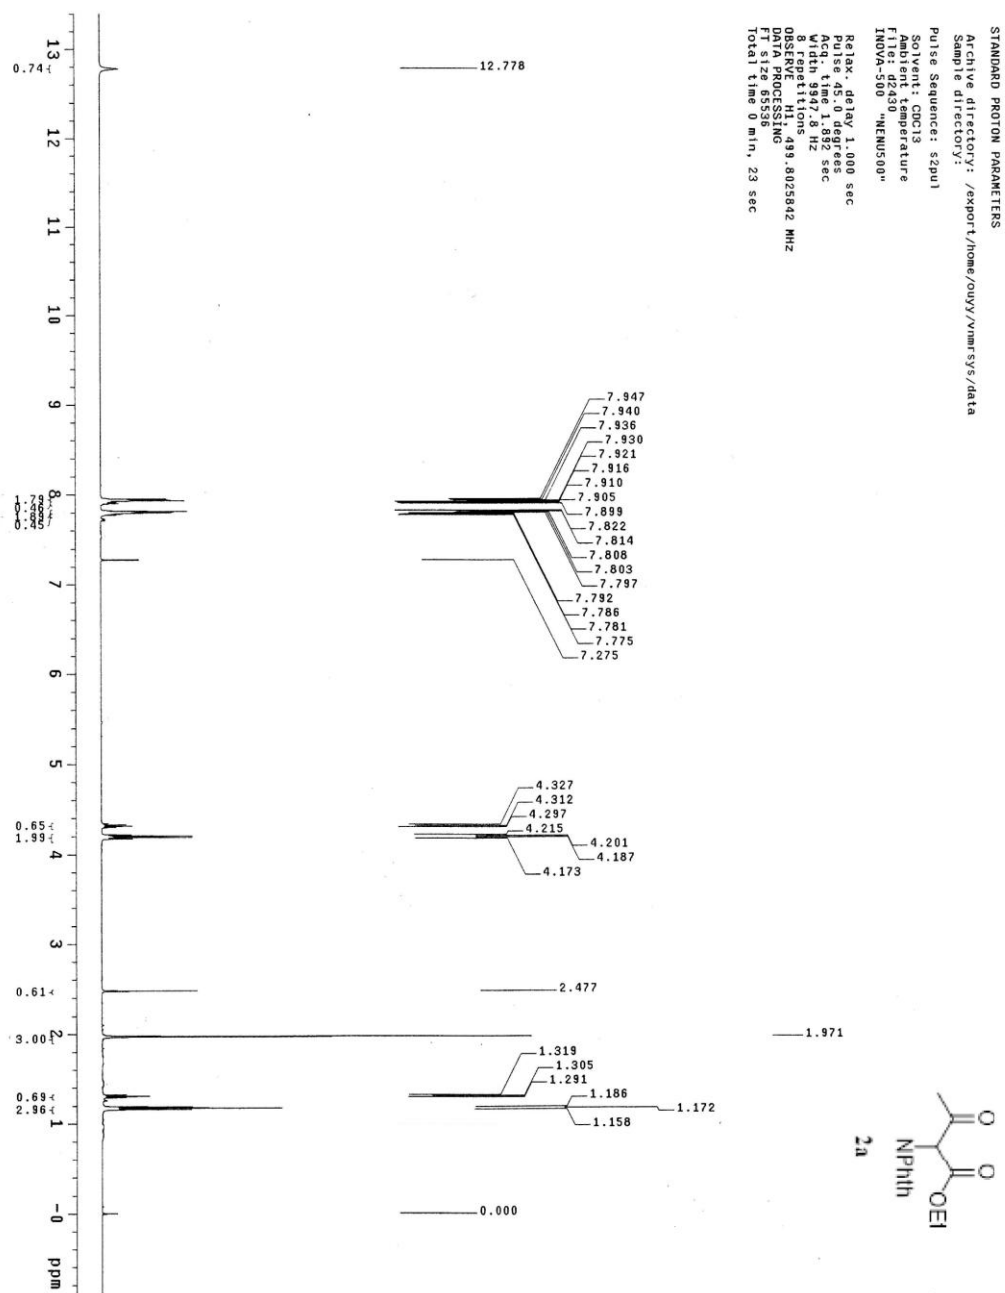

STANDARD CARBON PARAMETERS

Archive directory: /export/home/ouyf/vmmr/ysc/data  
 Sample directory:

Pulse Sequence: s2pul  
 Solvent: cdcl3  
 Ambient Temperature  
 User: ouyf  
 File: d2853  
 INOVA-500 "MENV500"

Relax: delay 0.500 sec  
 Pulse: 12.000 sec  
 Acq: 1.000 sec  
 Width: 31421.8 Hz  
 64 Repetitions  
 OBSERVE: 013, 125.6754814 MHz  
 PULSEPROG: zgpg30  
 Power: 42 db  
 CONTINUOUSLY ON  
 DALTZ-16 modulated  
 DA: 100000000  
 Line Broadening: 1.5 Hz  
 FT size: 131072  
 Total time: 3 hr, 56 sec

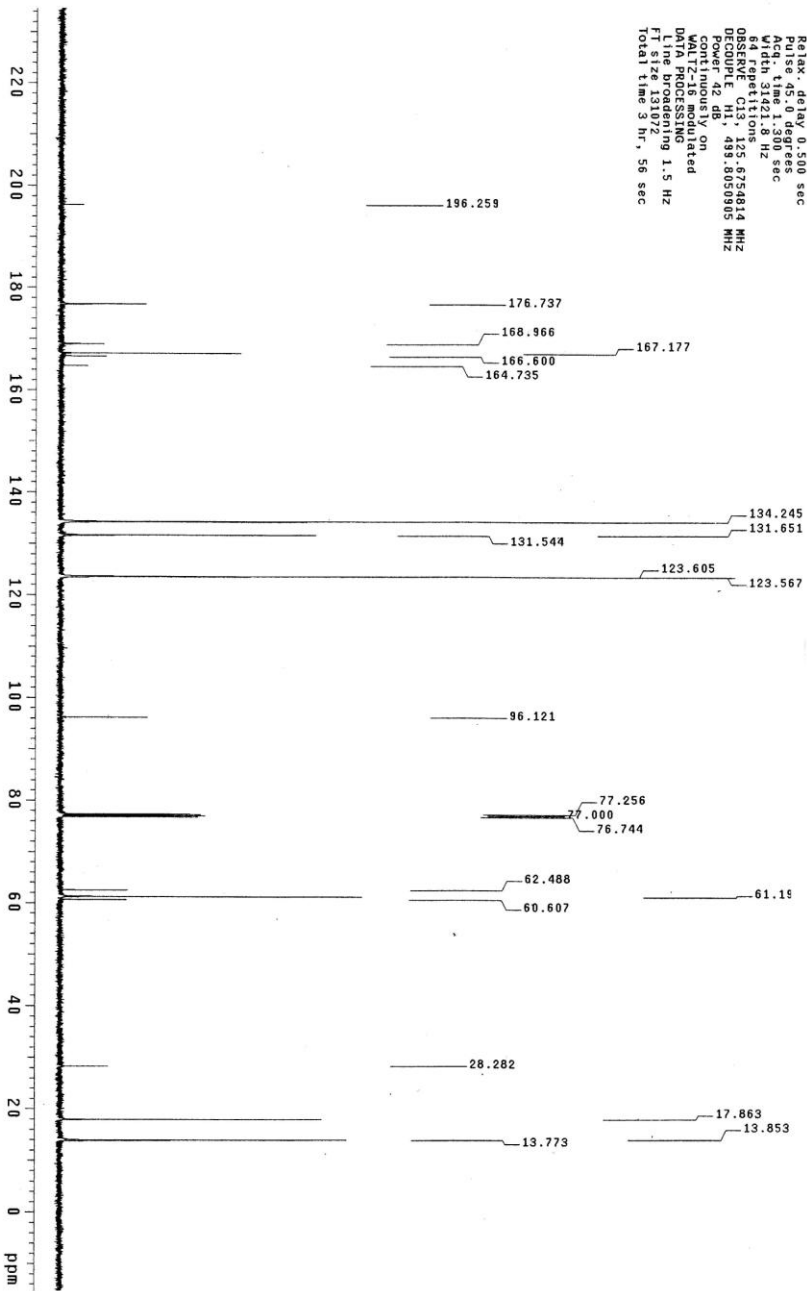

STANDARD PROTON PARAMETERS  
 Archive directory: /export/home/ouyy/vnmr/sys/data  
 Sample directory:  
 Pulse Sequence: s2p11  
 Solvent: CDCl3  
 Ambient temperature  
 INOVA-500 "1H500"  
 Relax. delay 1.000 sec  
 Pulse 45.0 degrees  
 Acq. time 1.892 sec  
 F1 500.1362 MHz  
 F2 100.6216 MHz  
 OBSERVE H1, 499.8025975 MHz  
 DATA PROCESSING  
 Total size 65536  
 Total time 0 min, 2 sec

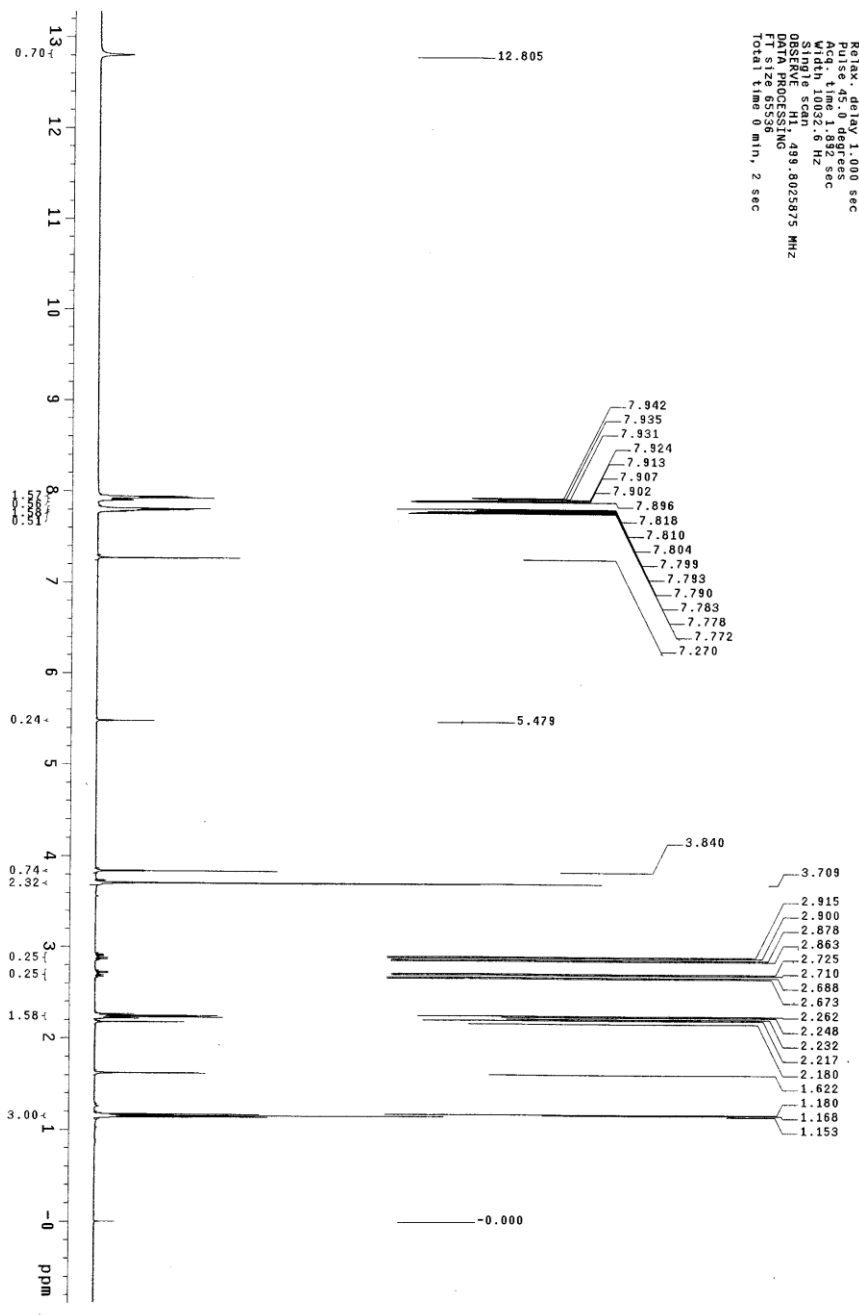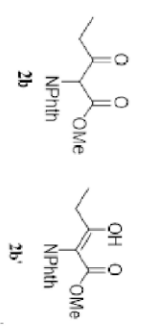

STANDARD CARBON PARAMETERS

Archive directory: /export/home/ouyy/vnmr/svs/data  
 Sample directory:

Pulse Sequence: s2pul1

Solvent: cdcl3

Temperature: 144.4

User: l144

File: d2882

INOVA-500 "MENU500"

Relax. delay: 0.500 sec

Acq. time: 1.300 sec

Width: 31421.8 Hz

0.258 repetitions

DECOUPLE: 43.429, 675495 MHz

Power: 42 db

continuously on

DATA: F2, 13C, 130K, 130K

Line Broadening: 1.5 Hz

FT size: 131072

Total time: 3 hr, 56 sec

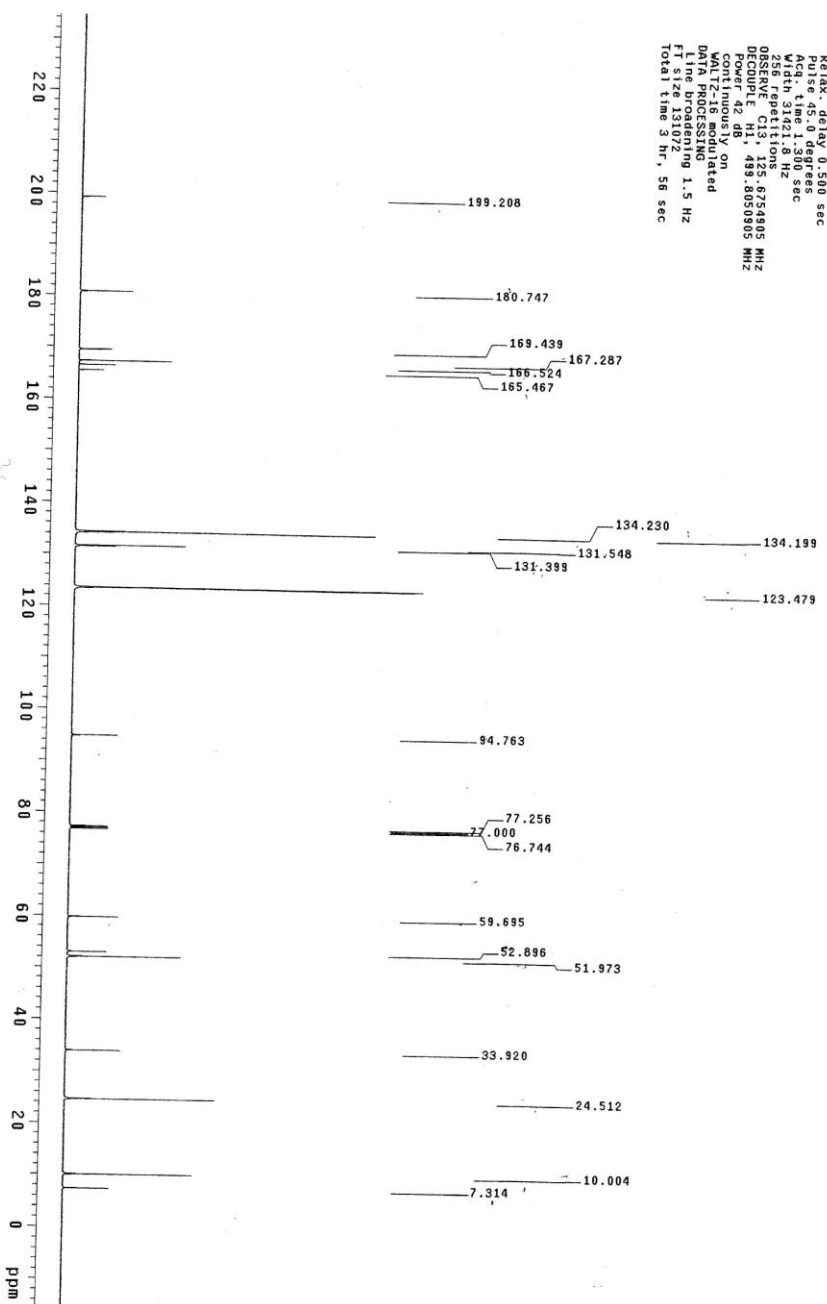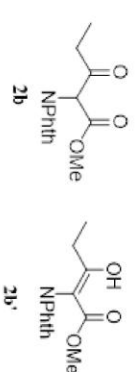

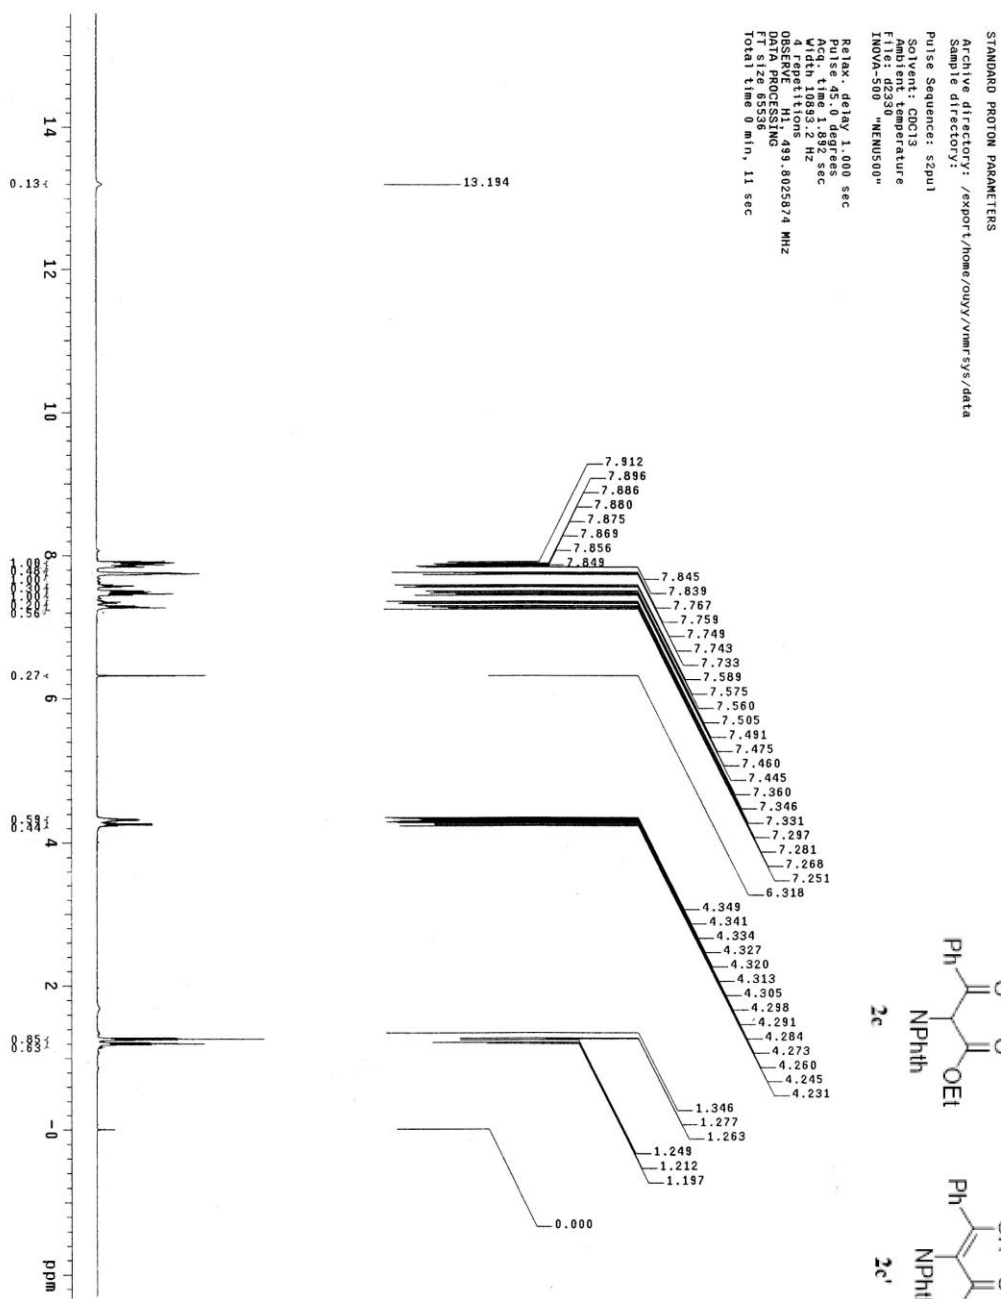

STANDARD CARBON PARAMETERS  
 Archive directory: /export/home/ouyy/vmm/sys/data  
 Sample directory:  
 Pulse Sequence: s2pul  
 Solvent: cdcl3  
 Ambient temperature  
 User: ds2487  
 INOVA-500 "MEXUS500"

Relax. delay: 0.500 sec  
 Pulse: 45.0 degrees  
 Width: 9.021 sec  
 128 Repetitions  
 OBSERVE: C13, 125.6755030 MHz  
 DECOUPLE: H1, 499.8059305 MHz  
 continuously on  
 WALTZ-16 modulated  
 DATA PROCESSING  
 FT size: 131072  
 Total time: 3 hr., 56 sec

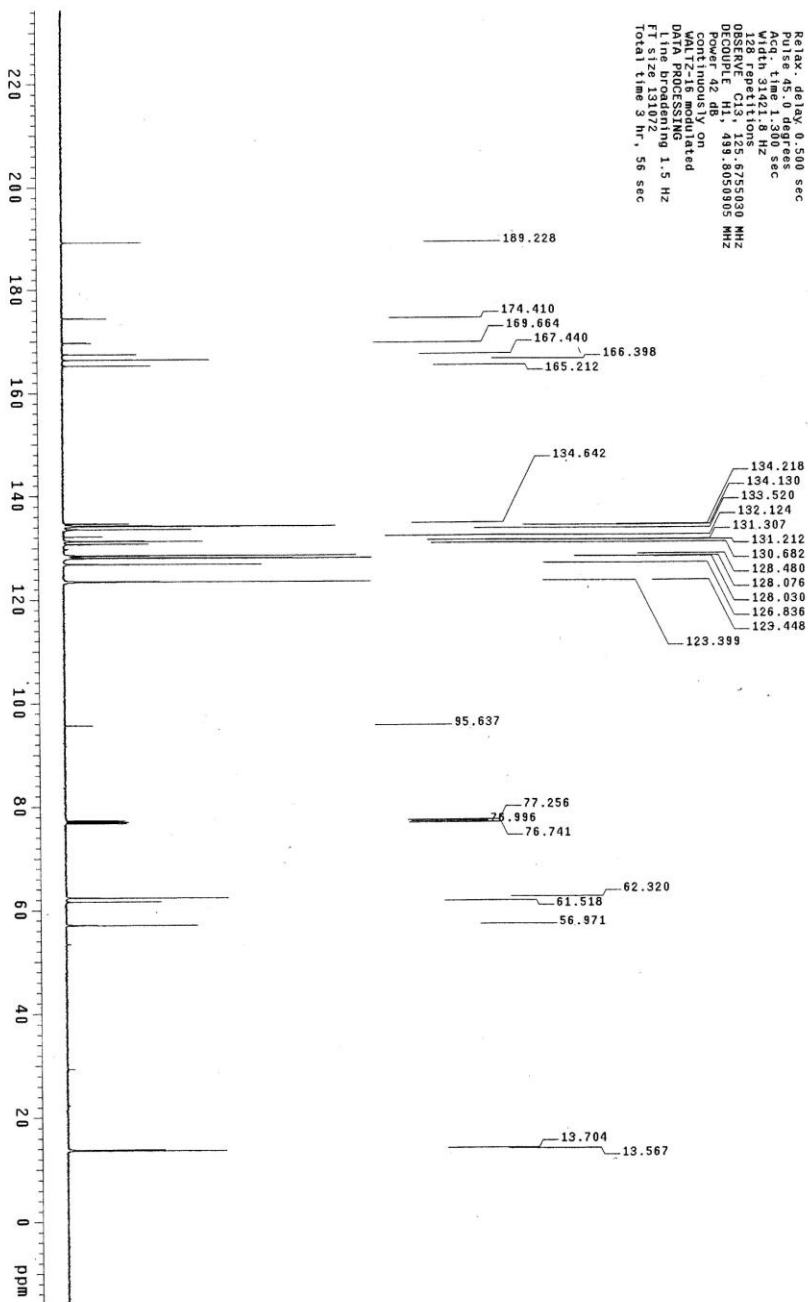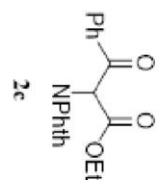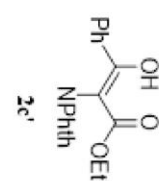

STANDARD PROTON PARAMETERS

Archive directory: /export/home/duyy/vmr/svs/data  
Sample directory:  
Pulse Sequence: s2pul  
Solvent: CDCl3  
Ambient temperature  
File: d2649 "NENU500"  
INOVA-500 "NENU500"  
Pulse delay 1.000 sec  
Pulse 45.0 degrees  
Acq. time 1.892 sec  
Width 10311.9 Hz  
Observations 499.3025859 MHz  
DATA PROCESSING  
FT size 65536  
Total time 0 min, 11 sec

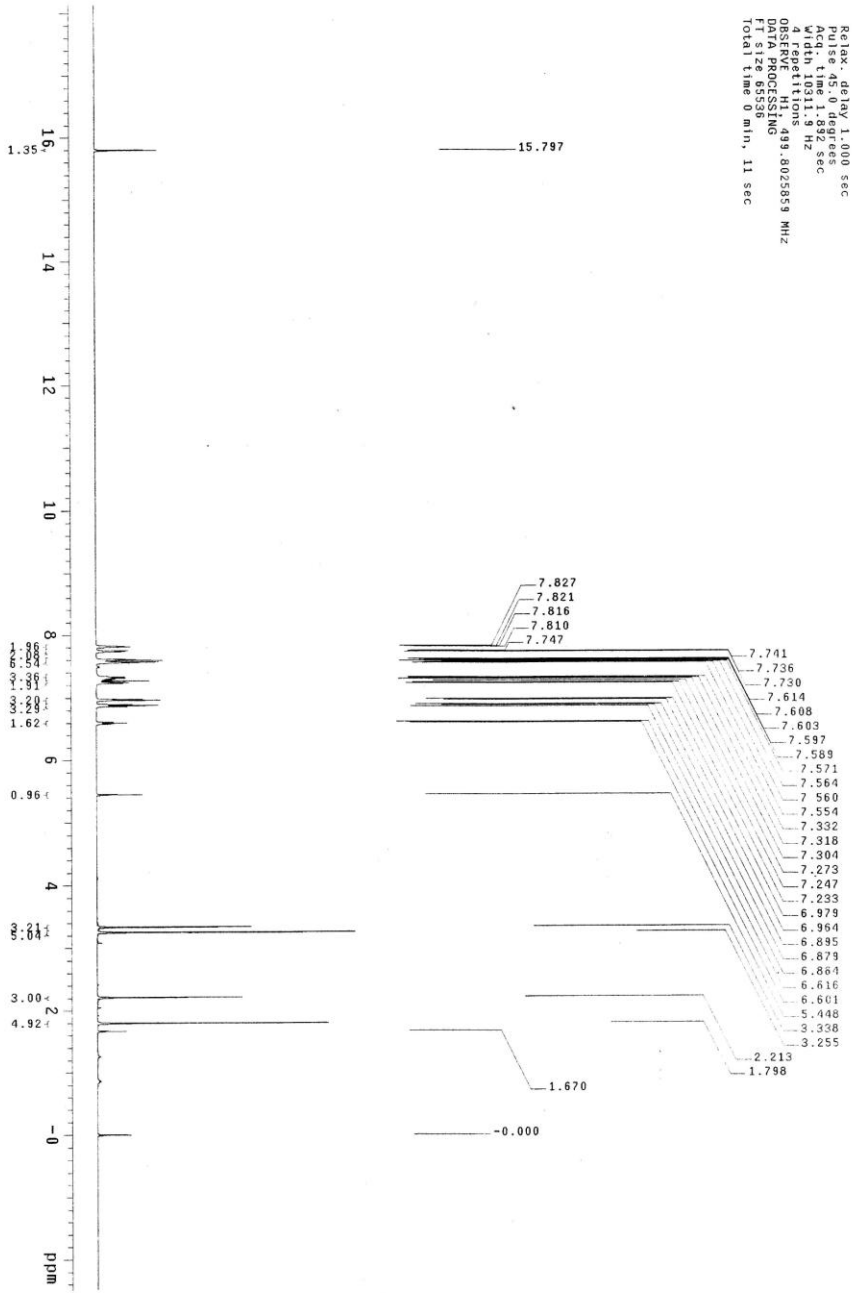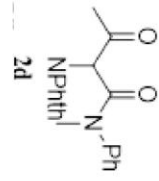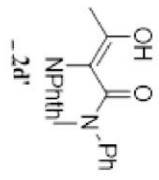

STANDARD CARBON PARAMETERS

Archive directory: /export/home/ouy/vnmr/sys/data

Sample directory:

Pulse Sequence: szpu1

Solvent: cdcl3

Sample Temperature

File: d2757

INOVA-500 "MENU500"

Relax. delay 0.500 sec

Acq. time 1.300 sec

Width 31421.8 Hz

128 repetitions: 675673

DESCRIBE C13, 439.805905 MHz

Power 42 dB

continuously on

MATZ-100 irradiated

Line broadening 1.5 Hz

FT size 131072

Total time 3 hr, 58 sec

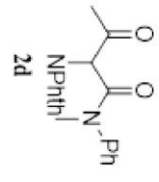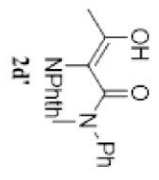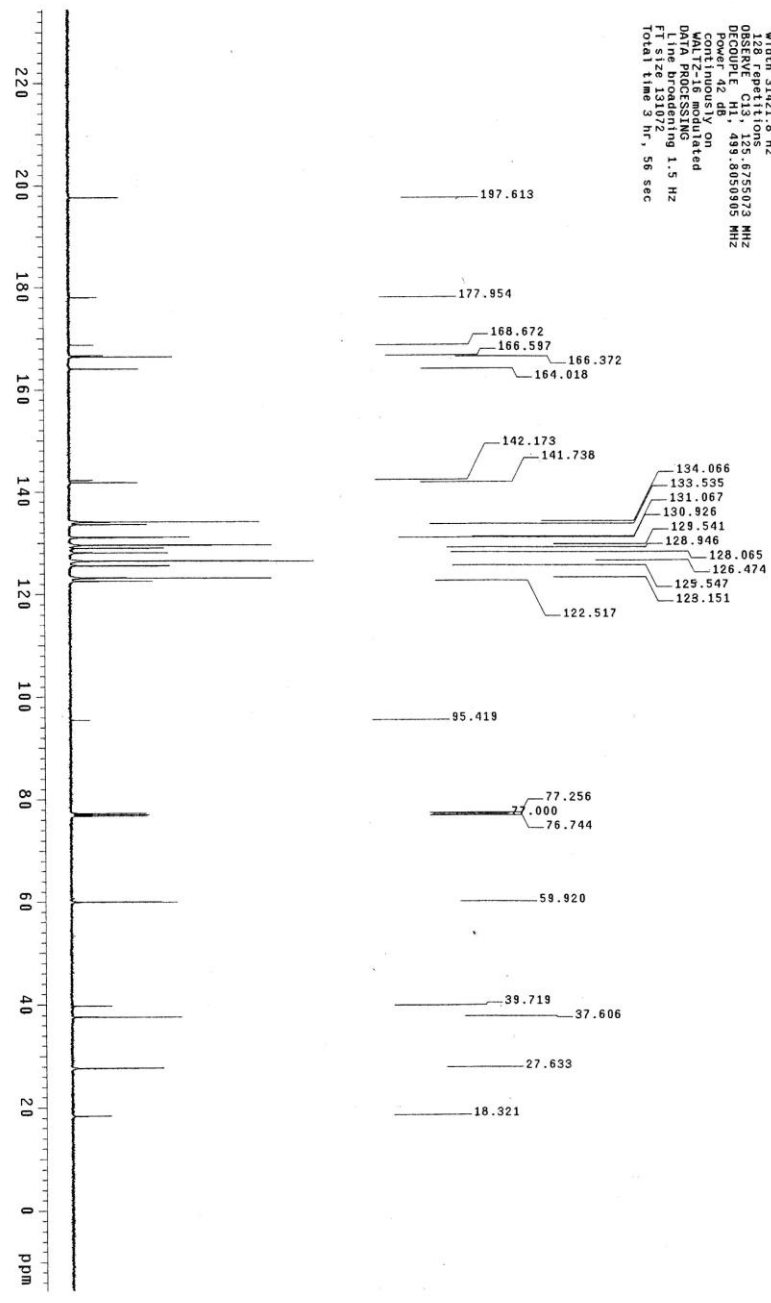



STANDARD PROTON PARAMETERS

Archive directory: /export/home/ouyy/vnmr/sys/data  
Sample directory:  
Pulse Sequence: s2pu1  
Solvent: CDCl3  
Ambient temperature  
File: d2592 "MEMU500"  
INOVA-500 "MEMU500"  
Relax delay 1.000 sec  
Pulse delay 45.0 degrees  
Acq. time 1.892 sec  
Width 10311.9 Hz  
Frequency 499.8025855 MHz  
OBSERVE N1 499.8025855 MHz  
DATA PROCESSING  
FT size 65536  
Total time 0 min, 11 sec

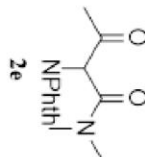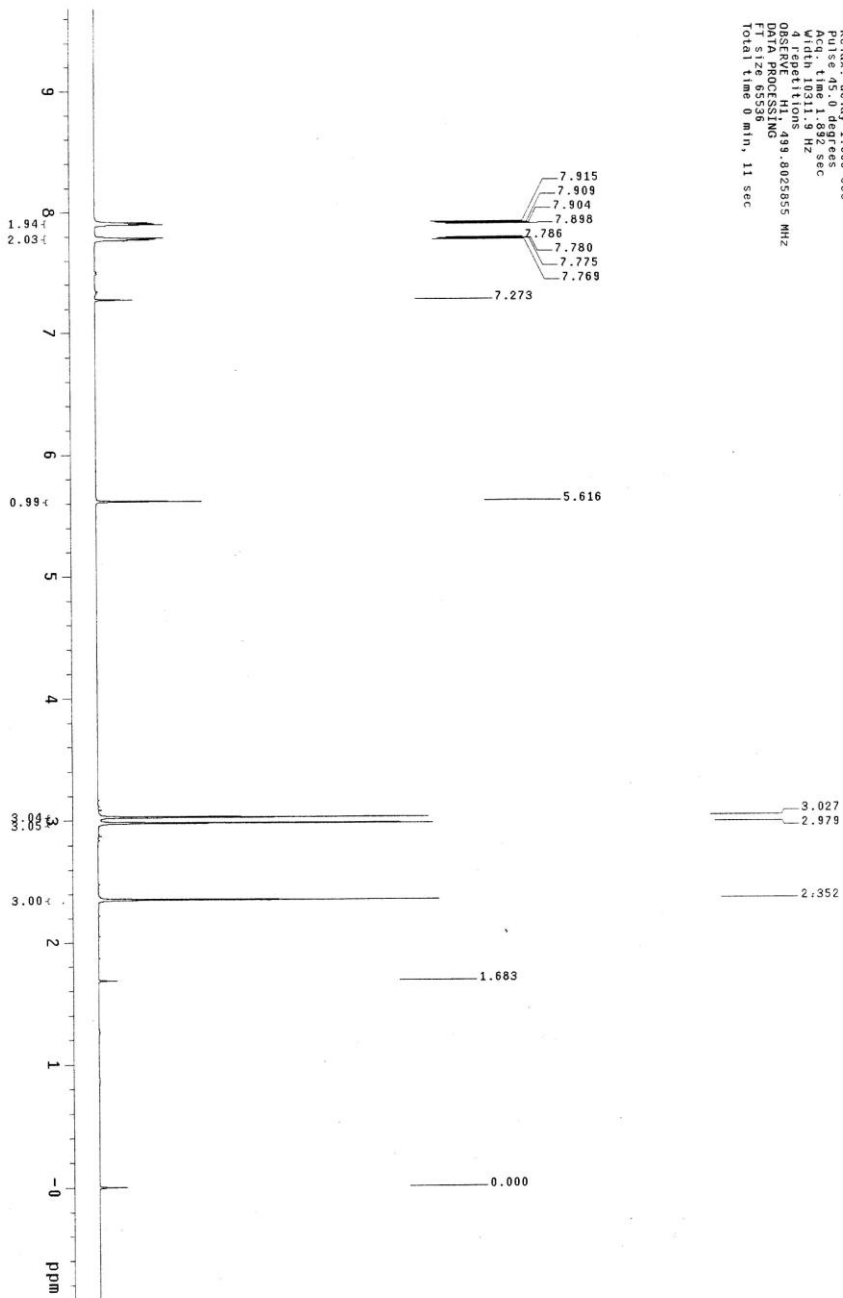

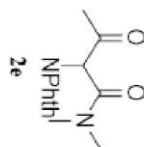

STANDARD CARBON PARAMETERS  
 Archive directory: /export/home/ouyy/vnmr/sys/data  
 Sample directory:  
 Pulse Sequence: szpu1  
 Solvent: cdcl3  
 Ambient temperature  
 User: 1-14-87  
 INOC: 420/40 "NEMUS00"  
 Relax. delay 0.500 sec  
 Pulse 45.0 degrees  
 Acq. time 1.300 sec  
 128 F2/10 Hz  
 128 F2/10 Hz  
 OBSERVE C13, 125.6754694 MHZ  
 DECOUPLE H1, 499.8050905 MHZ  
 Power 42.00  
 VOLTAGE 100  
 VALT2-18 modulated  
 DATA PROCESSING  
 Line Broadening 1.5 Hz  
 Frequency 125.7613500 MHz  
 Total time 2 Hr, 3 min, 31 sec

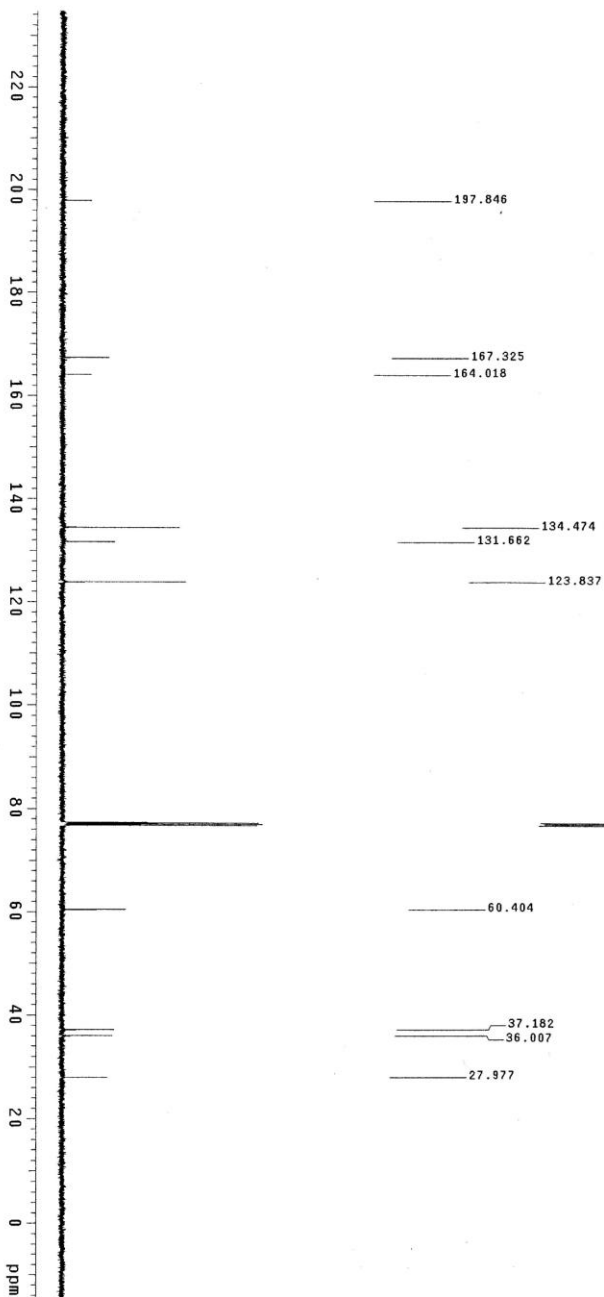

STANDARD PROTON PARAMETERS  
 Archive directory: /export/home/ouyy/vnmr/sys/data  
 Sample directory:  
 Pulse Sequence: s2pu1  
 Solvent: CDCl3  
 Ambient temperature  
 INOVA-500 "NMR500"  
 Relax. delay: 1.000 sec  
 Pulse: 45.0 degrees  
 Acq. time: 1.892 sec  
 Nucleus: 13C  
 4 repetitions  
 OBSERVE: H1, 499.8025837 MHz  
 DATA PROCESSING  
 Total size: 65530  
 Total time: 9 min., 11 sec

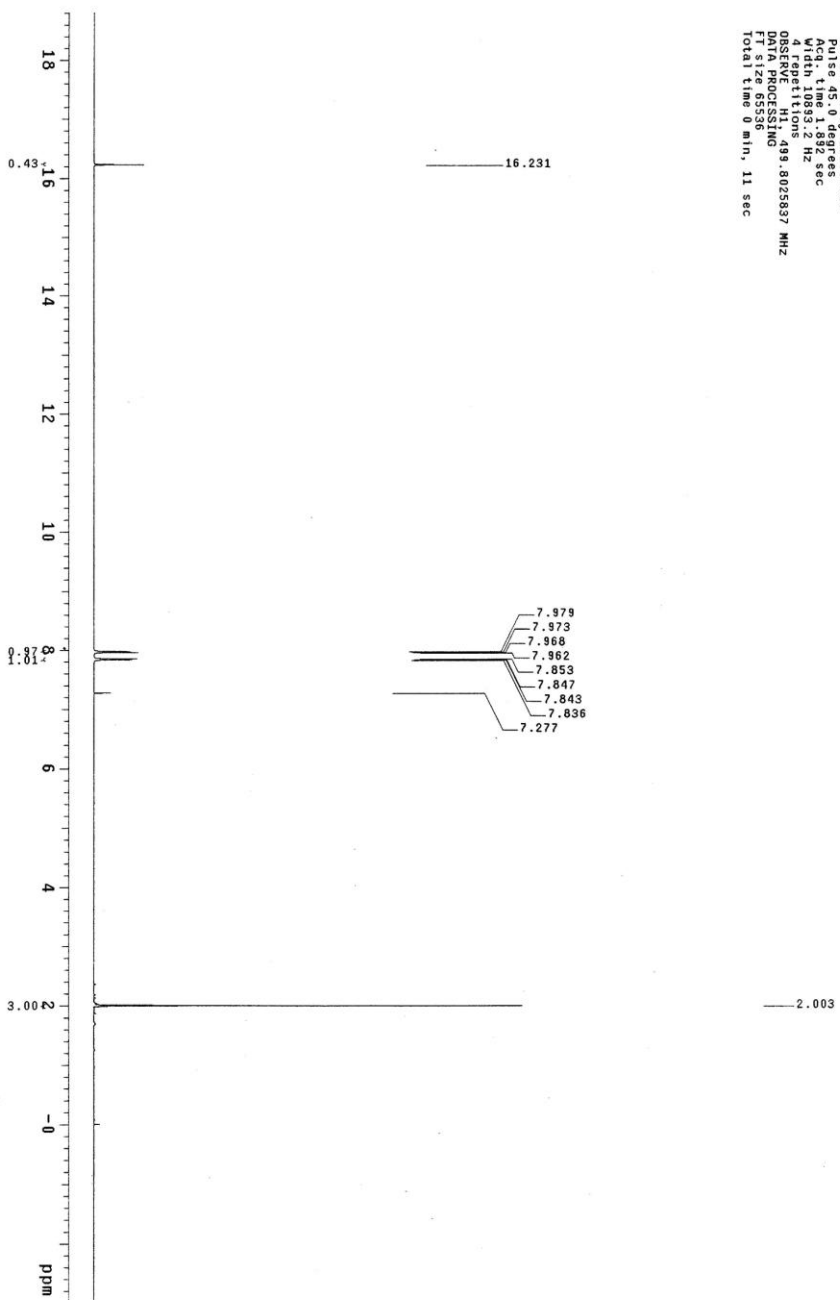

STANDARD CARBON PARAMETERS

Archive directory: /export/home/ouyy/vnmr/sys/data  
Sample directory:

Pulse Sequence: szpu1  
Solvent: cdc13  
Ambient temperature  
User: 1-14-87  
File: dz247  
INSTR: 500  
PULPROG: "zgpg30"

Relax: delay 0.500 sec  
Pulse 45.0 degrees  
Acq. time 1.300 sec  
V1: 12.000 MHz  
V2: 125.7654661 MHz  
OBSERVE C13: 125.7654661 MHz  
DECOUPLE H1: 499.8050985 MHz  
Power 42.00 dB  
WALTZ-16 modulated  
DATA PROCESSING  
Line broadening 1.5 Hz  
F1 size 32768  
Total time 2 m, 3 min, 31 sec

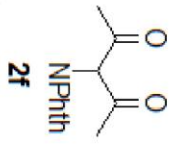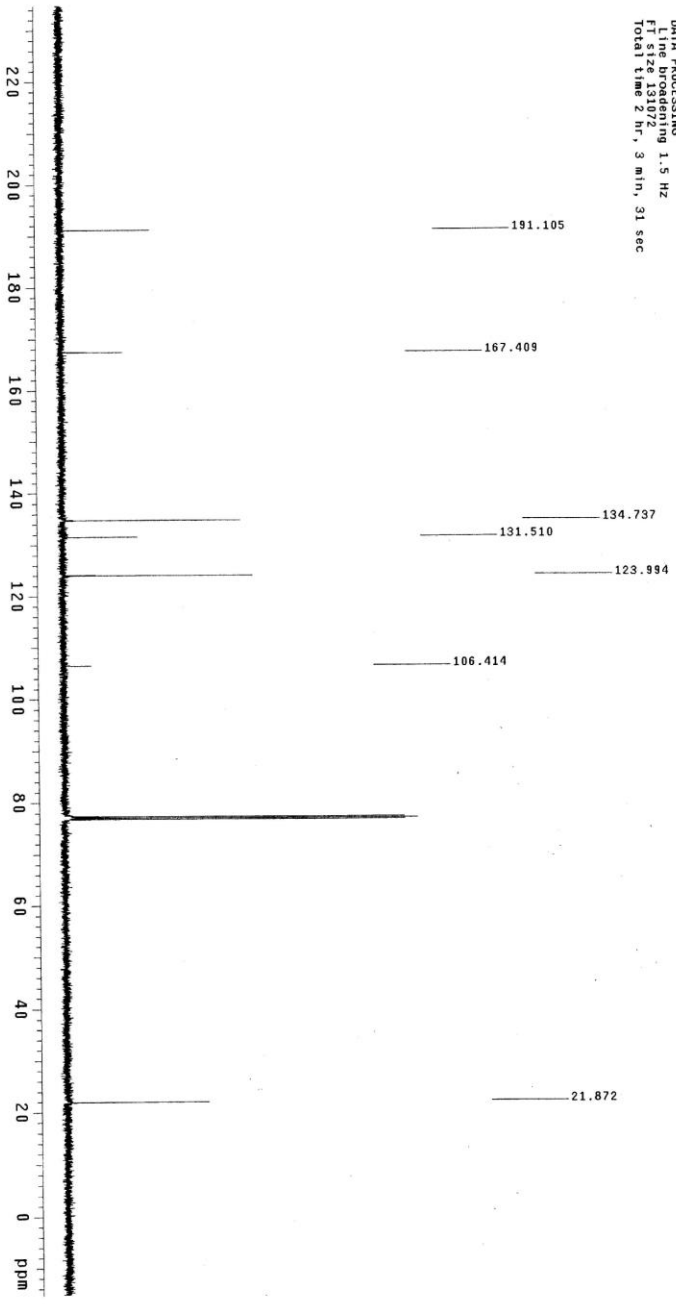

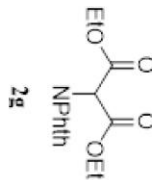

STANDARD PROTON PARAMETERS  
 Archive directory: /export/home/ouyy/vnmr/sys/data  
 Sample directory:  
 Pulse Sequence: s2pu1  
 Solvent: CDCl3  
 Ambient temperature  
 File: d2275 "NEMUS00"  
 INOVA-500 "NEMUS00"  
 Relax. delay 1.000 sec  
 Pulse 45.0 degrees  
 Acq. time 1.492 sec  
 Width 10893.2 Hz  
 OBSERVE H1 499.8025844 MHz  
 DATA PROCESSING  
 FT size 65536  
 Total time 0 min, 11 sec

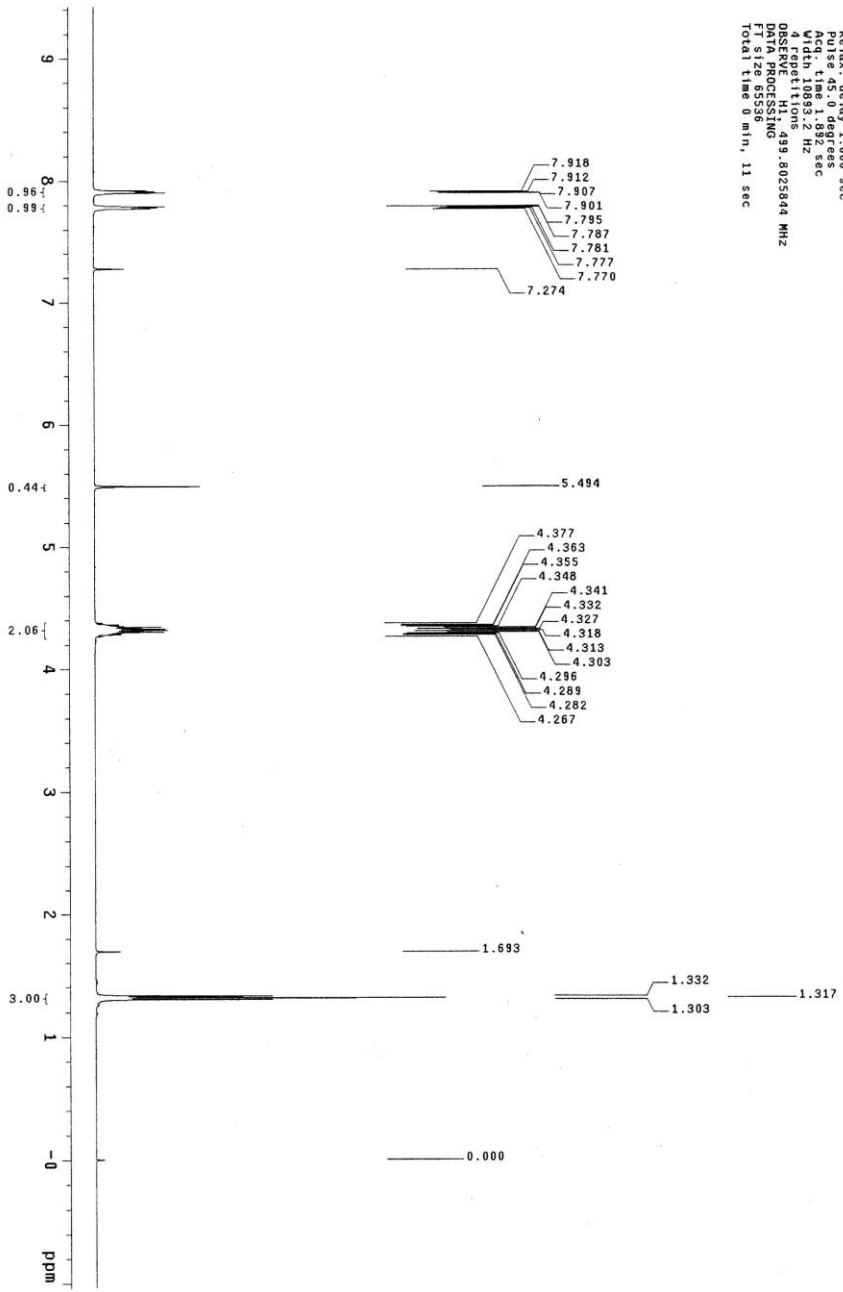

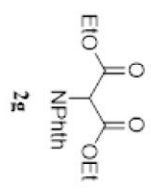

STANDARD CARBON PARAMETERS  
 Archive directory: /export/home/ouyy/vnmr/sys/data  
 Sample directory:  
 Pulse Sequence: szpu1  
 Solvent: CDCl3  
 Ambient Temperature  
 User: dz24-87  
 FT size 131072  
 INOVA-500 "NENU500"  
 Relax: delay 0.500 sec  
 Pulse: delay 45.0 degrees  
 Width: 1.800 sec  
 Width: 31.800 Hz  
 192 repetitions  
 OBSERVE: C13, 125.6754670 MHz  
 DECOUPLE: H1, 499.8050905 MHz  
 Spect: 4.18  
 continuously on  
 WALTZ-16 modulated  
 DATA PROCESSING 1.5 Hz  
 FT size 131072  
 Total time 2 hr., 3 min., 31 sec

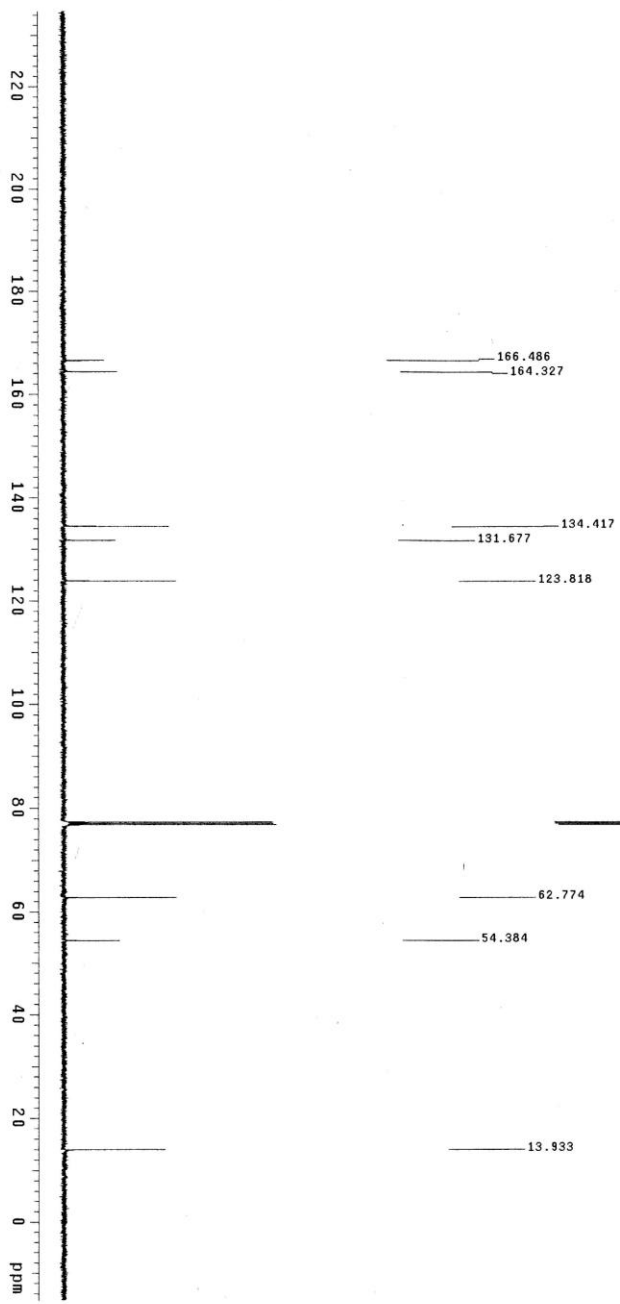

STANDARD PROTON PARAMETERS  
Archive directory: /export/home/ouvy/vnmr/svs/data  
Sample directory:  
Pulse Sequence: s2pul  
Solvent: CDCl3  
Ambient temperature  
File: d2890 "NENU500"  
INOVA-500 "NENU500"  
Relax delay 1.000 sec  
Pulse delay 0.000 sec  
Acq time 1.892 sec  
Width 9744.2 Hz  
OS repetitions 489.8025384 MHz  
DATA PROCESSING  
FT size 65536  
Total time 0 min, 11 sec

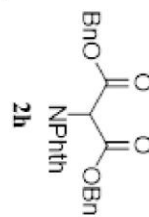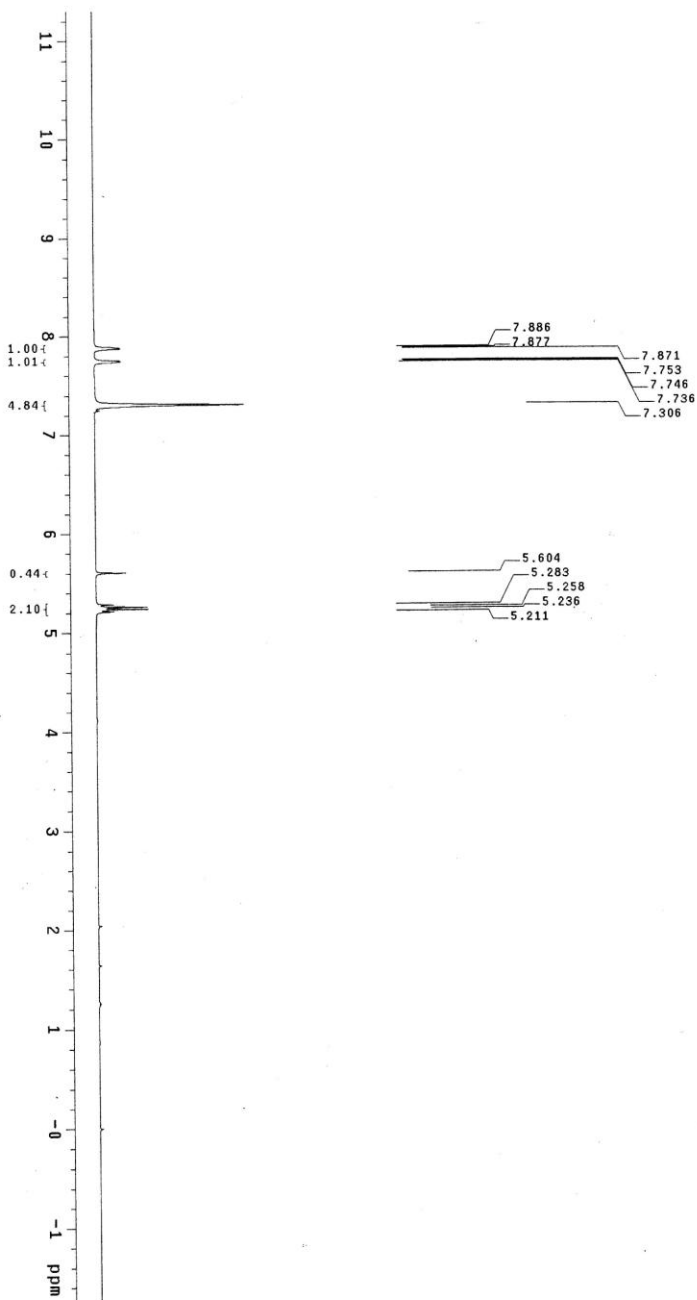

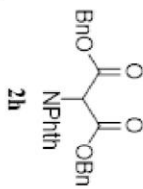

STANDARD CARBON PARAMETERS  
 Archive directory: /export/home/ouyy/vmmr/sys/data  
 Sample directory:  
 Pulse Sequence: szpu1  
 Solvent: cdcl3  
 Ambient temperature  
 User: 1-14-87  
 INOVA-500 "MENSU00"  
 Relax. delay 0.500 sec  
 Pulse 45.0 degrees  
 Acq. time 1.300 sec  
 F1 125.760 MHz  
 192 Repetitions  
 OBSERVE C13, 125.6754723 MHz  
 DECOUPLE H1, 499.8050905 MHz  
 Coupl Innucl 0  
 Coupl Innucl2 0  
 VALT2-16 modulated  
 DATA PROCESSING  
 Line Broadening 1.5 HZ  
 F2 499.8050905 MHz  
 Total time 2 Hr, 3 min, 31 sec

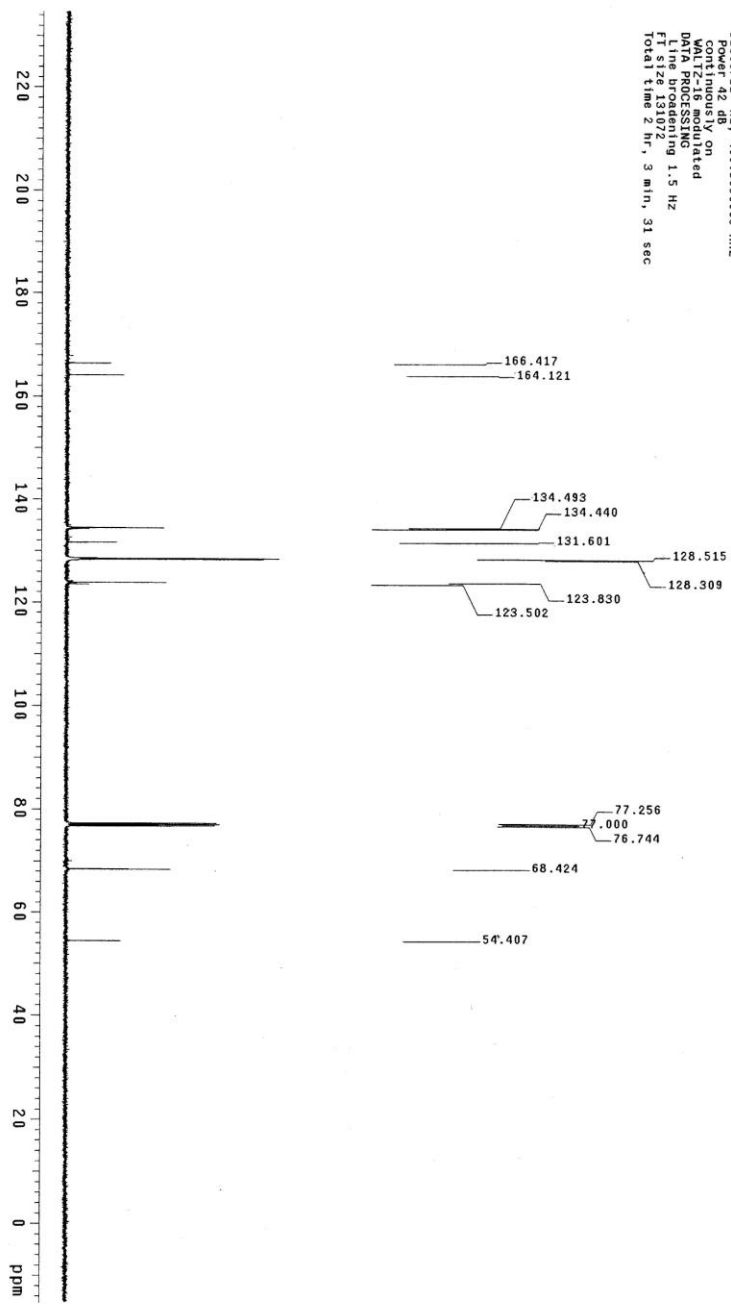



STANDARD PROTON PARAMETERS  
 Archive directory: /export/home/ouyy/vnmr/sys/data  
 Sample directory:  
 Pulse Sequence: szpu1  
 Solvent: CDCl3  
 Ambient temperature  
 File: d2718  
 INOVA-500 "MENU500"  
 Relax delay: 1.000 sec  
 Pulse: 45.0 deg, 0.000 sec  
 Acq. time: 1.382 sec  
 Width: 10311.9 Hz  
 OBSERVATIONS: 39.8025827 MHz  
 DATA PROCESSING  
 FT size: 65538  
 Total time: 0 min, 11 sec

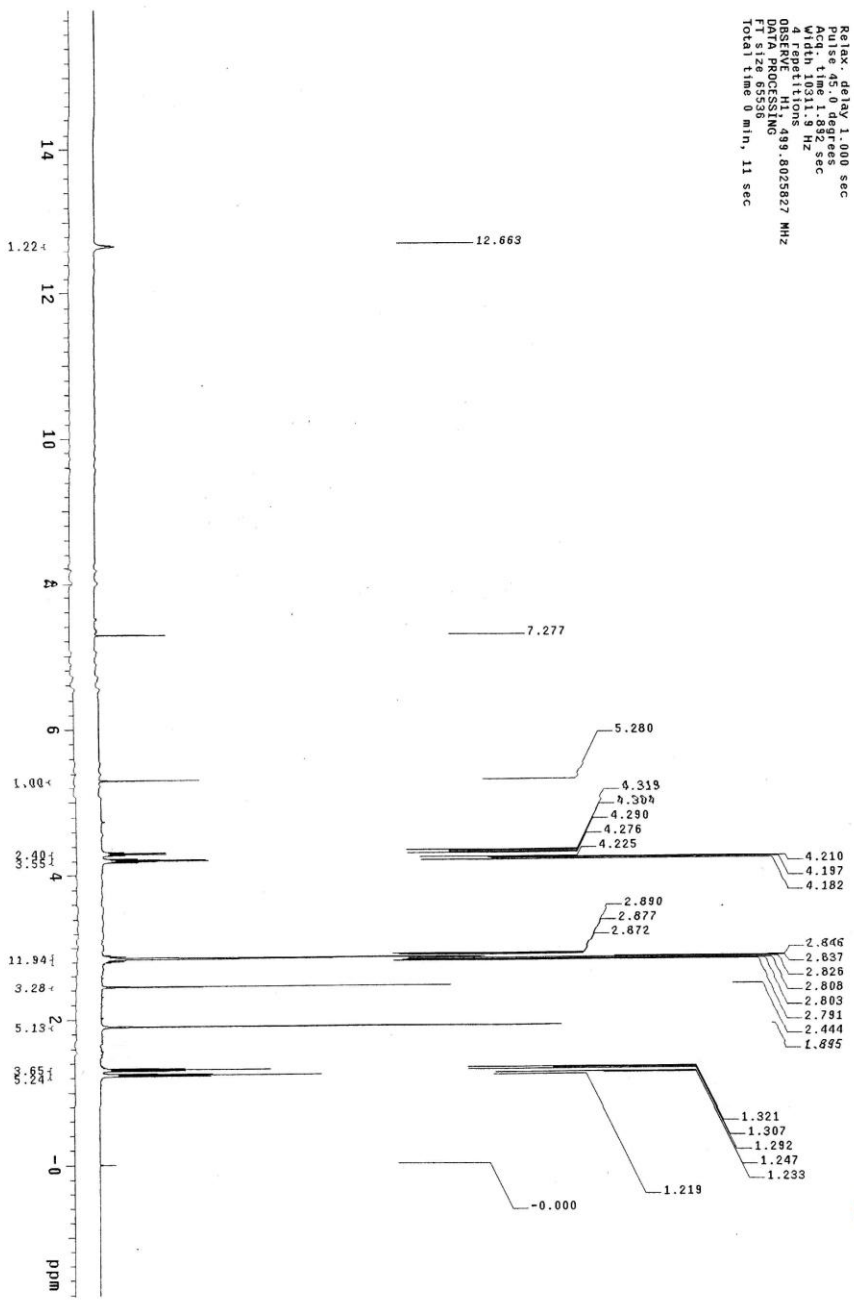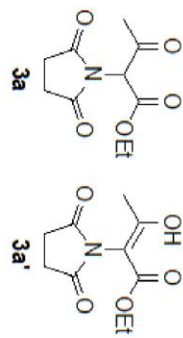

STANDARD CARBON PARAMETERS  
 Archive directory: /export/home/ouyy/vnmr/sys/data  
 Sample directory:  
 Pulse Sequence: szpul  
 Solvent: cdcl3  
 Ambient temperature  
 User: ds872  
 File: d2872  
 INOVA-500 "MENU500"

Relax. delay 0.500 sec  
 Pulse 45.0 degrees  
 Width 31421.8 Hz  
 128 repetitions  
 OBSERVE C13, 125.6754730 MHz  
 PULPROG zgpg30  
 CONTINUOUSLY on  
 VOLTAGE 16 modulated  
 DATA PROCESSING 1.5 Hz  
 FT size 131072  
 Total time 30 min, 52 sec

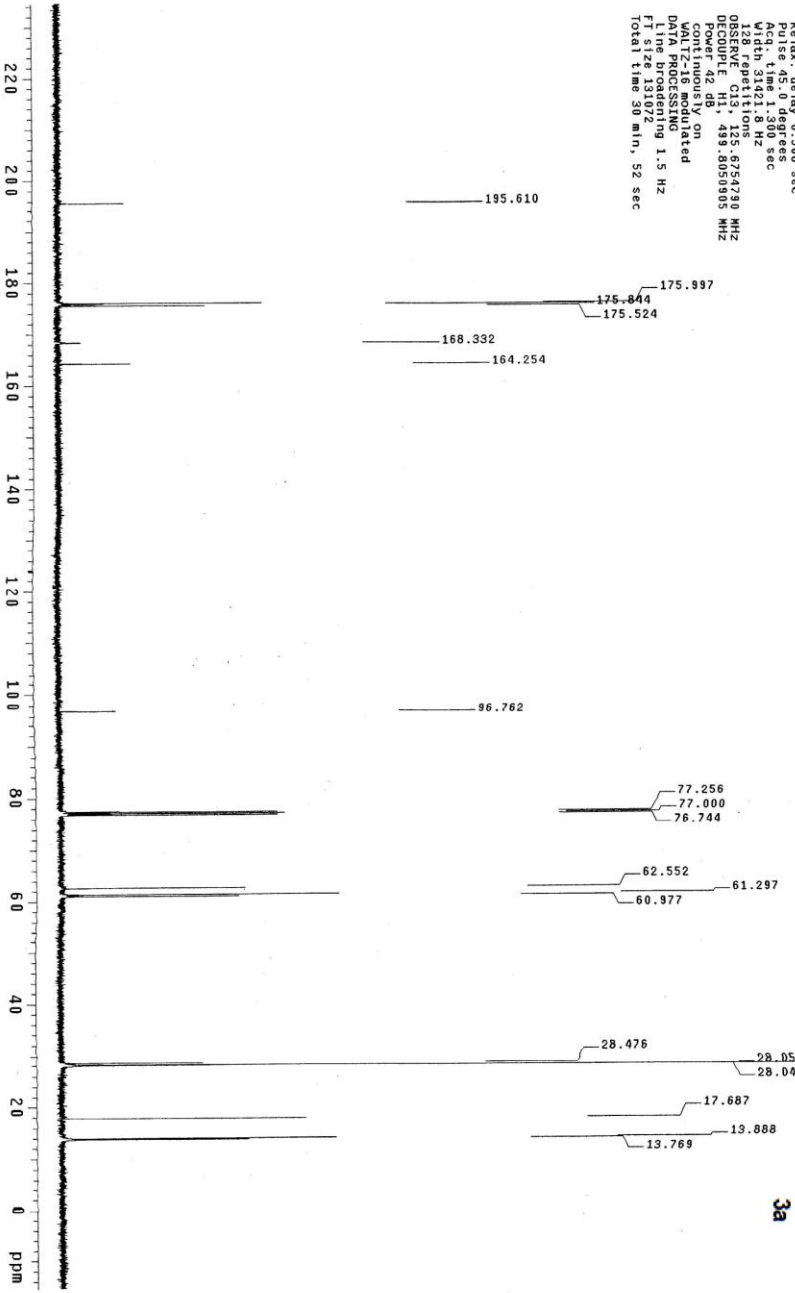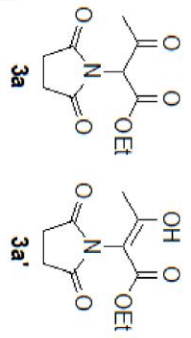

STANDARD PROTON PARAMETERS  
 Archive directory: /export/home/ouyy/vmrsys/data  
 Sample directory:  
 Pulse Sequence: sput1  
 Solvent: CDCl3  
 Acquisition Temperature  
 File: d2974  
 INOVA-500 "MENU500"  
 Relax. delay: 1.000 sec  
 Acq. time: 1.452 sec  
 Width: 9949.0 Hz  
 4 Repetitions: 49.8025687 MHZ  
 OBSERVED PROCESSING  
 FT size: 65536  
 Total time: 0 min, 11 sec

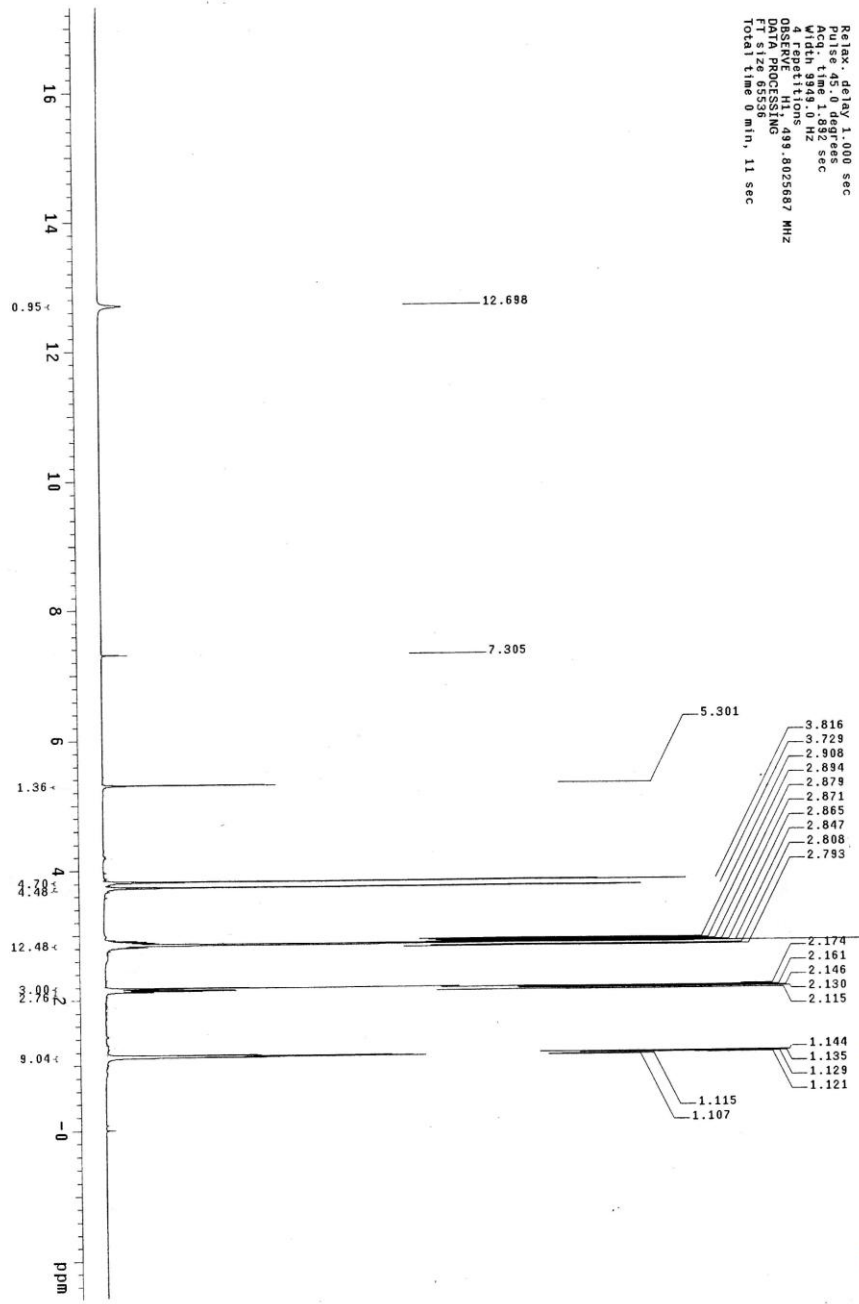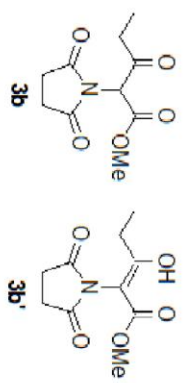

STANDARD CARBON PARAMETERS

Archive directory: /export/home/ouyy/vnmr/sys/data

Sample directory:

Pulse sequence: szpu1

Solvent: cdcl3

Ambient temperature

User: 1-14-87

File: d8035 "MENSU00"

INOVA-500 "MENSU00"

Relax: delay 0.500 sec

Pulse: 45.0 degrees

Acq: time 1.300 sec

Width: 31421.8 Hz

OBSERVE: C13 125.6754963 MHz

DECOUPLE: H1 499.8050905 MHz

Power: 42.00

WAIT: 16.000000

DATA PROCESSING

Line broadening 1.5 Hz

FT size: 131072

Total time: 9 hr, 56 sec

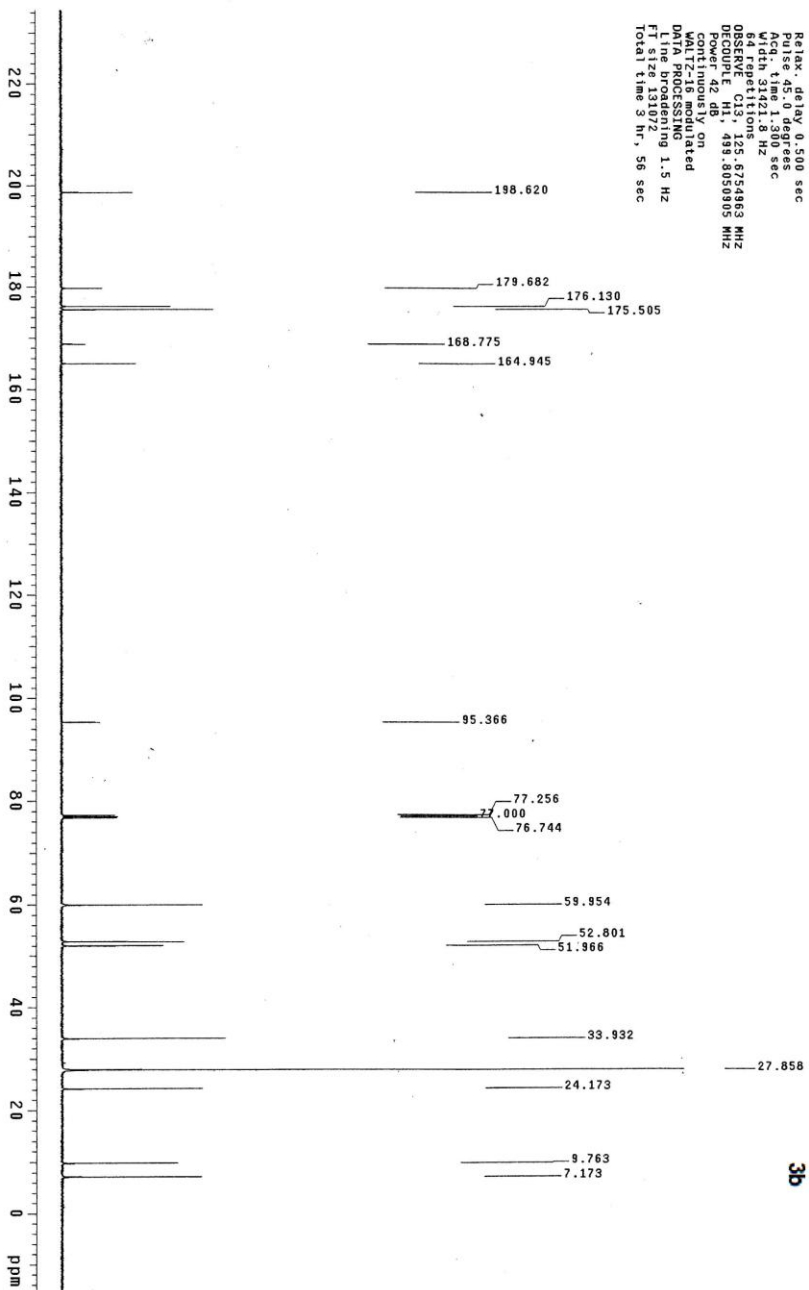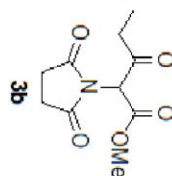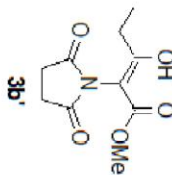

STANDARD PROTON PARAMETERS  
 Archive directory: /export/home/ouy/vnmr/sy/data  
 Sample directory:  
 Pulse Sequence: szpul  
 Solvent: CDCl3  
 Acquisition Temperature  
 INOVA-500 "NMR500"  
 Relax. delay 1.000 sec  
 Pulse 45.0 degrees  
 Width 999.0 Hz  
 4 repetitions  
 OBSERVE H1, 499.8025611 MHZ  
 P1 12.000000  
 P2 12.000000  
 P3 12.000000  
 Total time 0 min, 11 sec

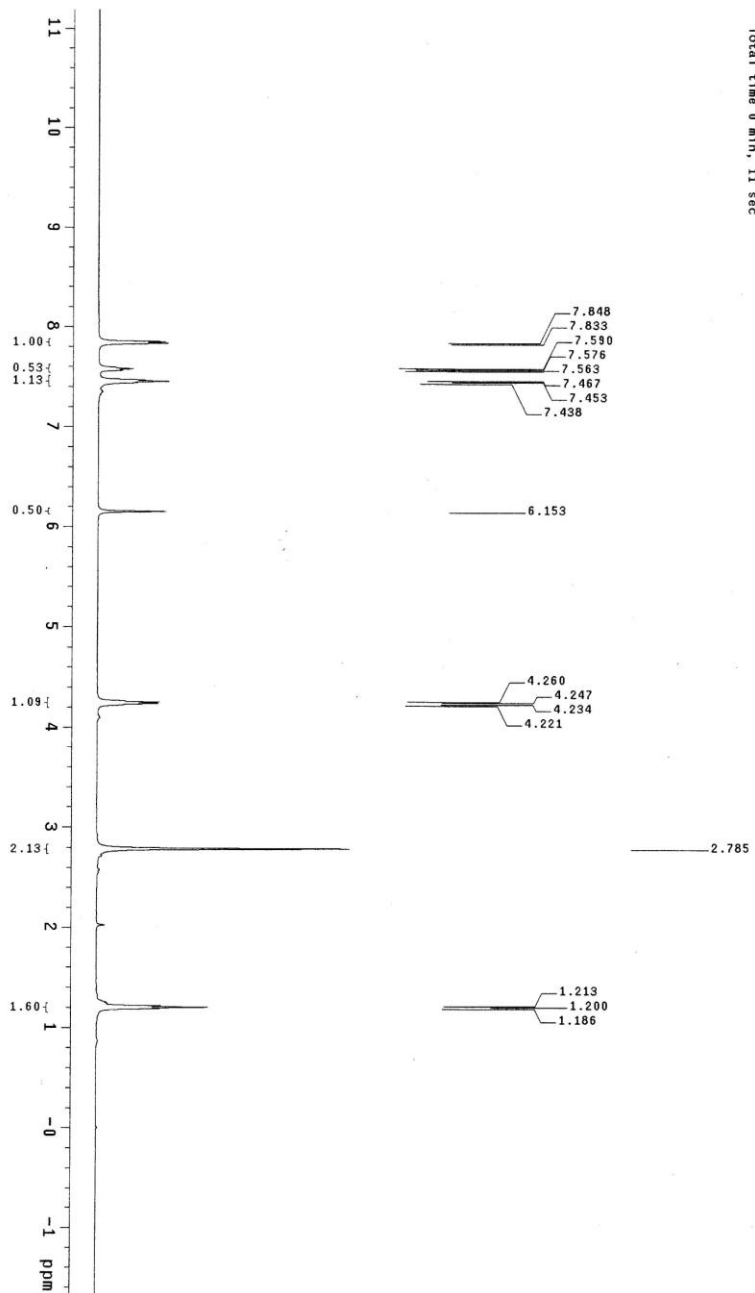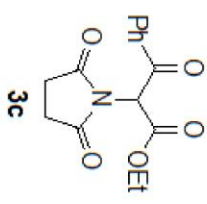

STANDARD CARBON PARAMETERS

Archive directory: /export/home/ouy/vnmr/sys/data

Sample directory:

Pulse Sequence: szpul1

Solvent: cdcl3

Sample Temperature

File: d2978

INOVA-500 "NMR500"

Relax: delay 0.500 sec

Acq: time 1.500 sec

Width 31421.8 Hz

128 T repetitions 675466 MHz

DECOUPLE CH1 439.8050905 MHz

Power 42 db

continuously on

MULTI2:16 modulated

Line broadening 1.5 Hz

FT size 131072

Total time 3 hr, 56 sec

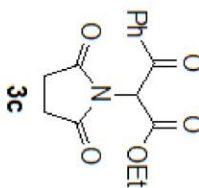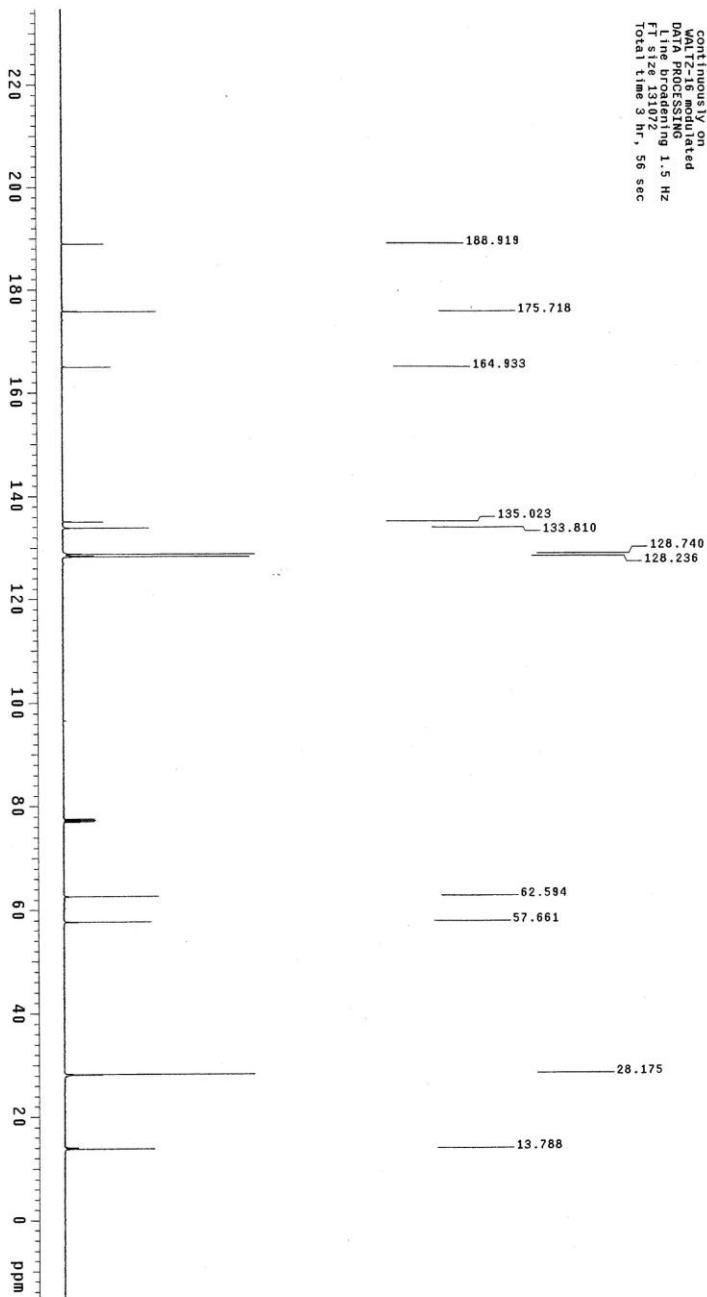

STANDARD PROTON PARAMETERS

Archive directory: /export/home/ouvy/vnmr/sys/data  
Sample directory:  
Pulse Sequence: szput  
Solvent: CDCl3  
Ambient temperature  
File: d679 MENU500  
INOVA-500 MENU500  
Polar: 40JAY 1.000 sec  
Pulse: 45 0 degrees  
Acq. time: 1.892 sec  
Width: 10311.9 Hz  
# of repetitions: 439.8025903 MHZ  
OS: 2.0000000000000000  
DATA PROCESSING  
FT size: 65536  
Total time: 0 min, 11 sec

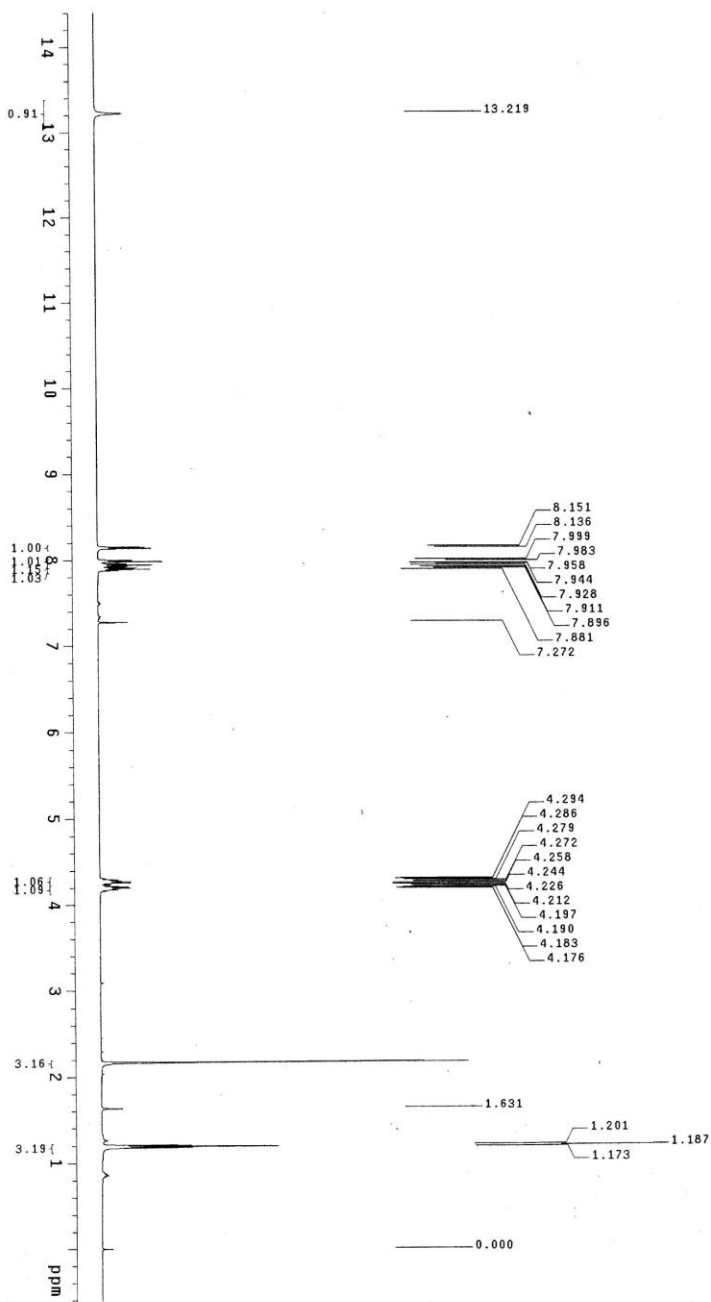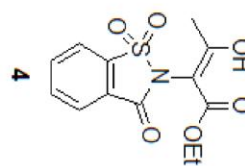

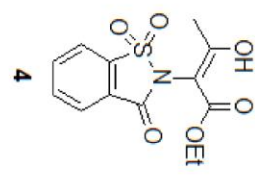

STANDARD CARBON PARAMETERS  
 Archive directory: /export/home/ouyy/vnmrSYS/data  
 Sample directory:  
 Pulse Sequence: s2pul  
 Solvent: cdcl3  
 Ambient temperature  
 User: jz14-87  
 INOVA-500 "NMR500"  
 Relax. delay 0.500 sec  
 Pulse 45.0 degrees  
 Acq. time 1.500 sec  
 Acquisition 1.500 sec  
 128 repetitions  
 OBSERVE C13, 125.675689 MHZ  
 DECOUPLE H1, 499.8050905 MHZ  
 F2-2 0316072  
 CONTINUOUSLY ON  
 WALTZ-16 modulated  
 DATA PROCESSING 1.5 HZ  
 Total time 2 hr, 3 min, 31 sec

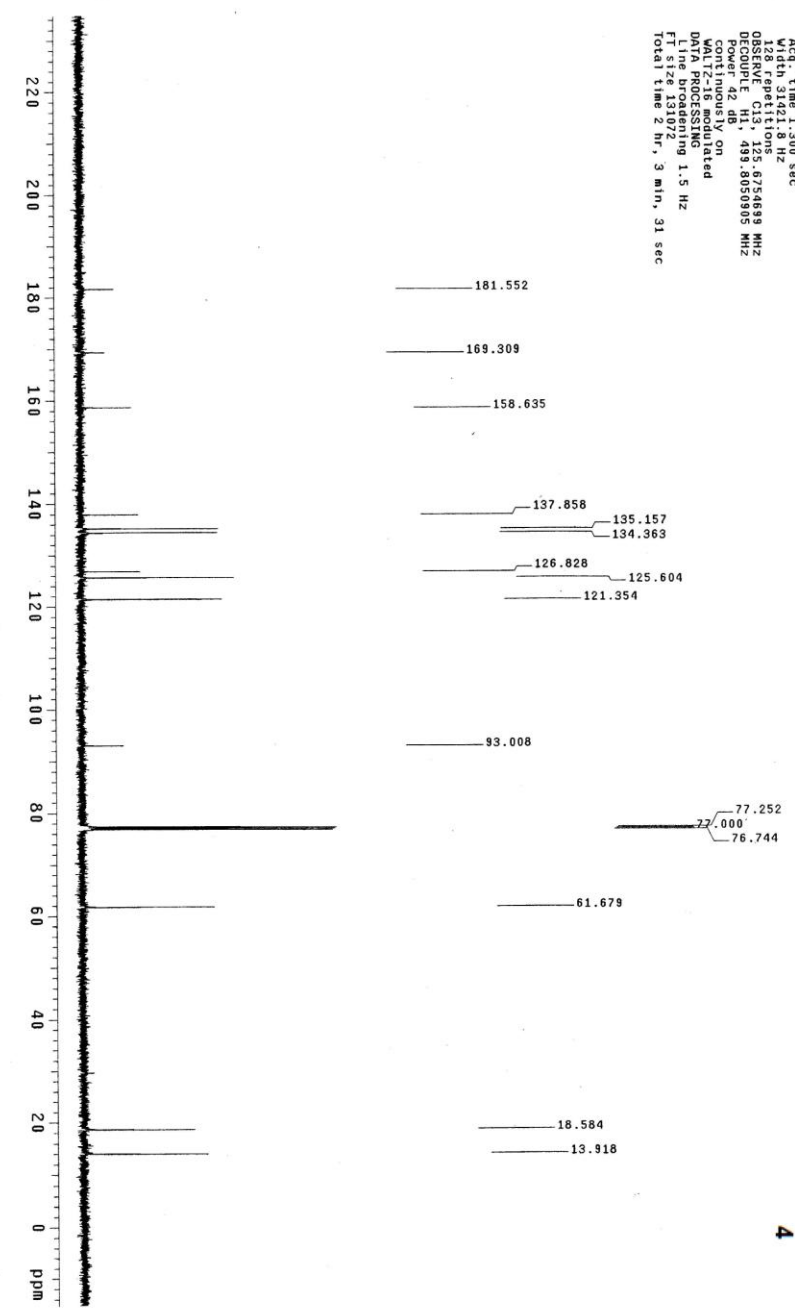



STANDARD PROTON PARAMETERS  
 Archive directory: /export/home/ouyy/vnmr/sys/data  
 Sample directory:  
 Pulse Sequence: s2pul  
 Solvent: CDCl3  
 Ambient Temperature  
 F1: 499.833 MHz  
 INOVA-500 "MENU500"  
 Relax. delay: 1.000 sec  
 Pulse: 45.0 degrees  
 Acq. time: 1.892 sec  
 Acq. date: 11/11/93  
 4 repetitions  
 OBSERVE: H1, 499.8025917 MHz  
 DATA PROCESSING  
 Total size: 65536  
 Total time: 9 min, 11 sec

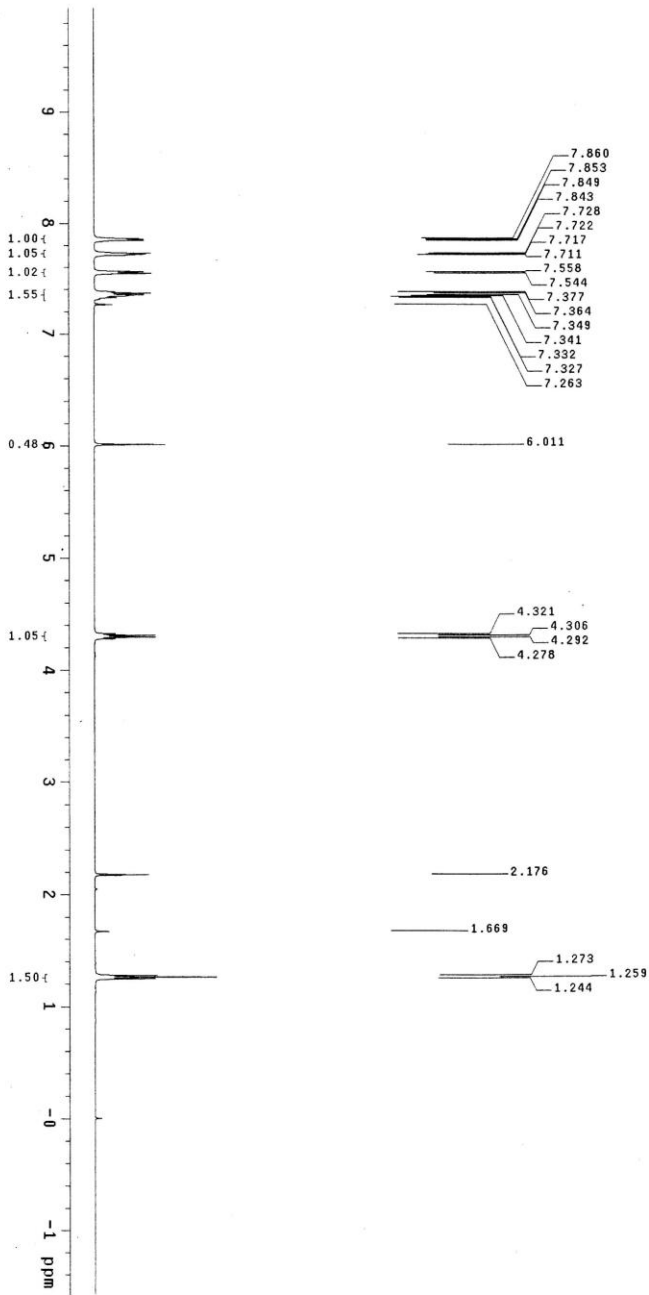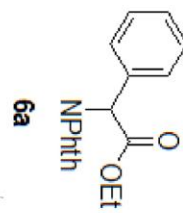

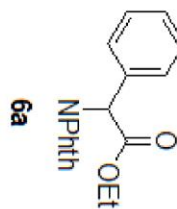

STANDARD CARBON PARAMETERS  
 Archive directory: /export/home/ouyy/vnmr/sys/data  
 Sample directory:  
 Pulse Sequence: szpul  
 Solvent: CDCl3  
 Ambient temperature  
 User: 1-14-87  
 File: d2722\MENU500\*  
 INVM=500 \*MENU500\*  
 Relax. delay 0.500 sec  
 Pulse 45.0 degrees  
 Acq. time 1.300 sec  
 29.000 MHz  
 OBSERVE C13, 125.6754685 MHz  
 DECOUPLE H1, 499.8050905 MHz  
 Power 42.00  
 WALTZ-16 modulated  
 DATA PROCESSING  
 Line broadening 1.5 Hz  
 F2=42.5013472  
 Total time 2.71, 3 min, 31 sec

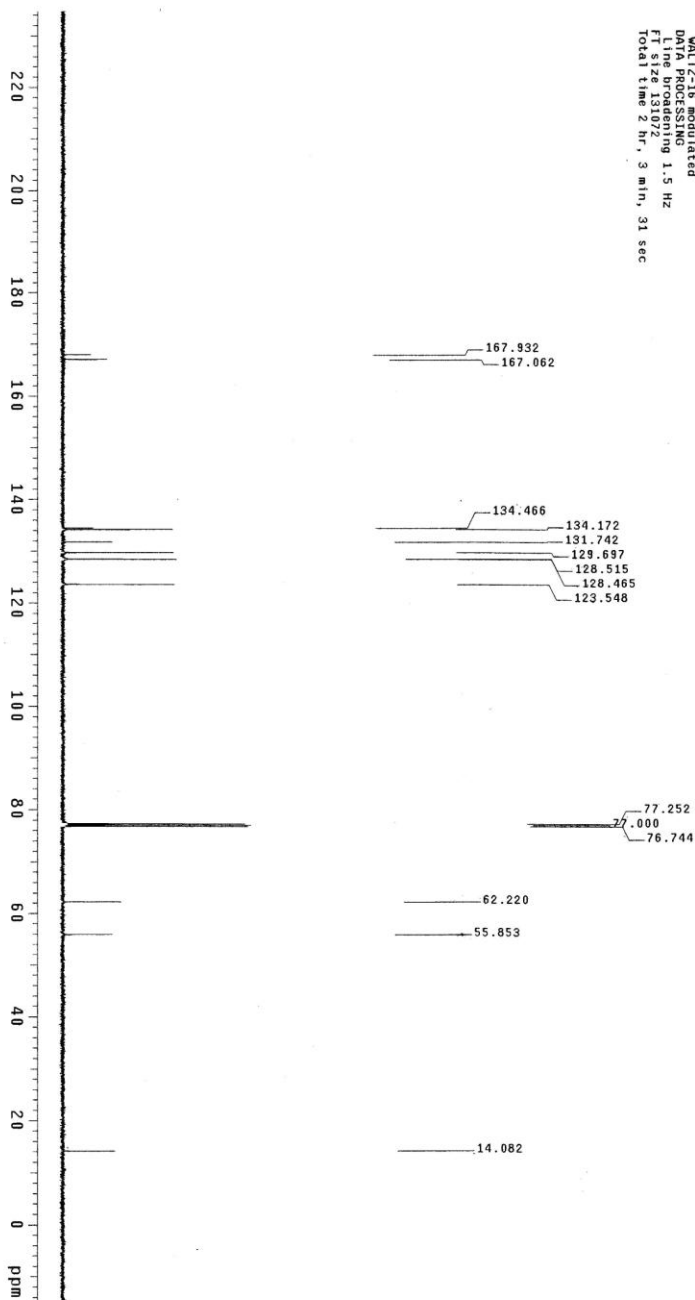

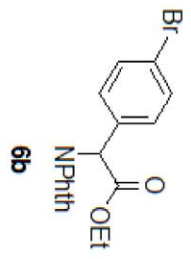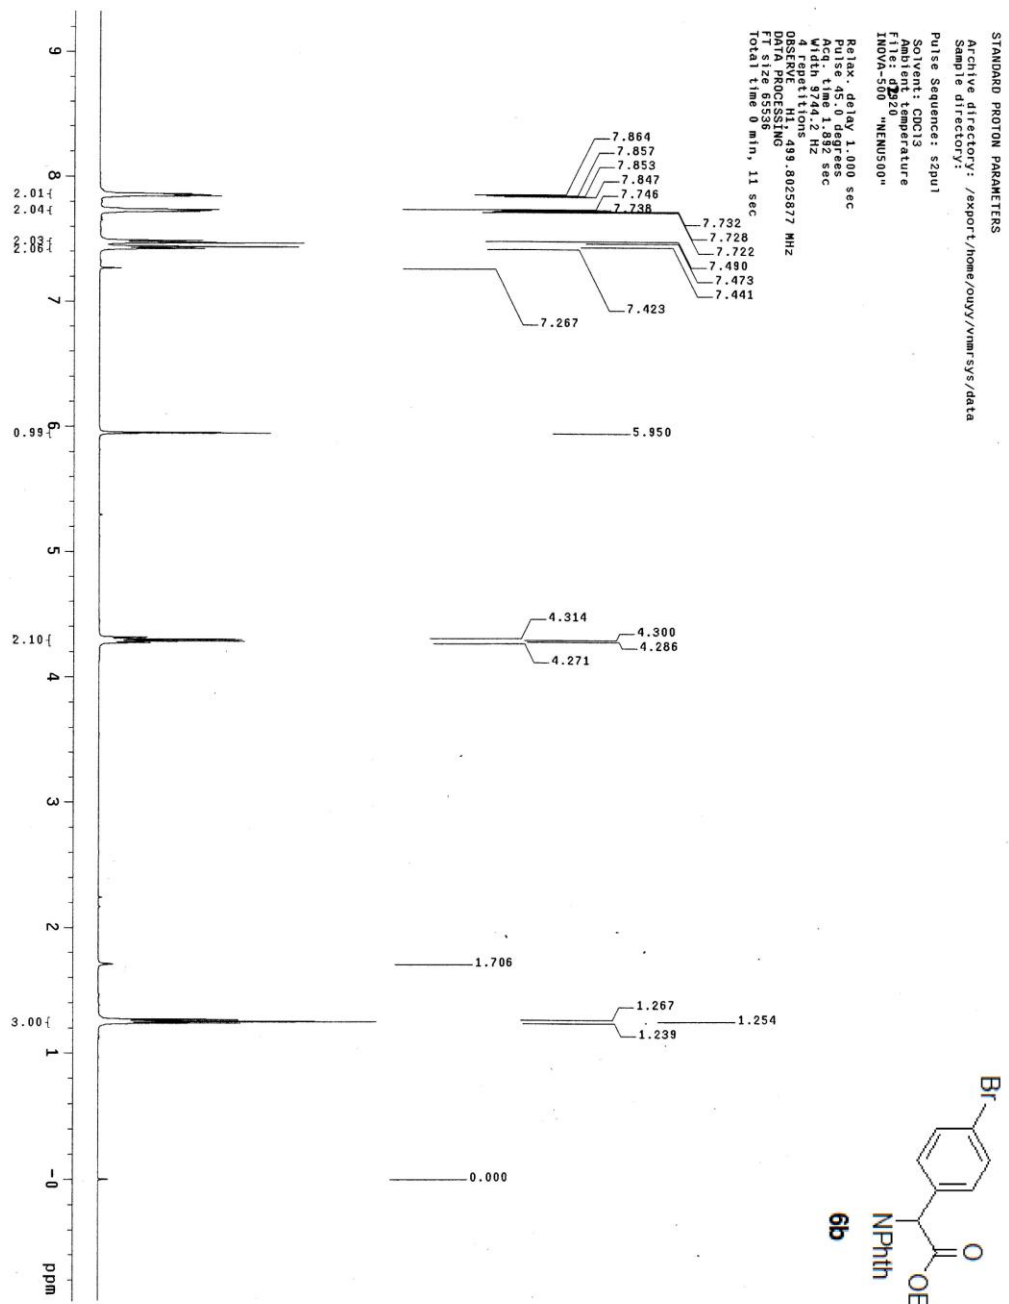

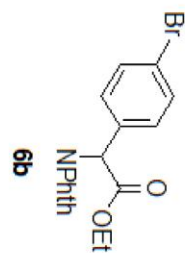

STANDARD CARBON PARAMETERS  
 Archive directory: /export/home/ouyy/vimr/sys/data  
 Sample directory:  
 Pulse Sequence: zgpu1  
 Solvent: cdcl3  
 Ambient temperature  
 User: I-14-87  
 File: d2934  
 INOVA-500 "MEXUS500"  
 Relax: delay 0.500 sec  
 Pulse: 45.0 degrees  
 Acq. time 1.300 sec  
 W: width 31421.8 Hz  
 OBSERVE: C13, 125.6754704 MHz  
 DECOUPLE: H1, 499.8050905 MHz  
 Power: 42 db  
 CONTINUOUSLY ON  
 WALTZ16  
 DATA PROCESSING  
 Line broadening 1.5 Hz  
 FT size 131072  
 Total time 9 hr, 58 sec

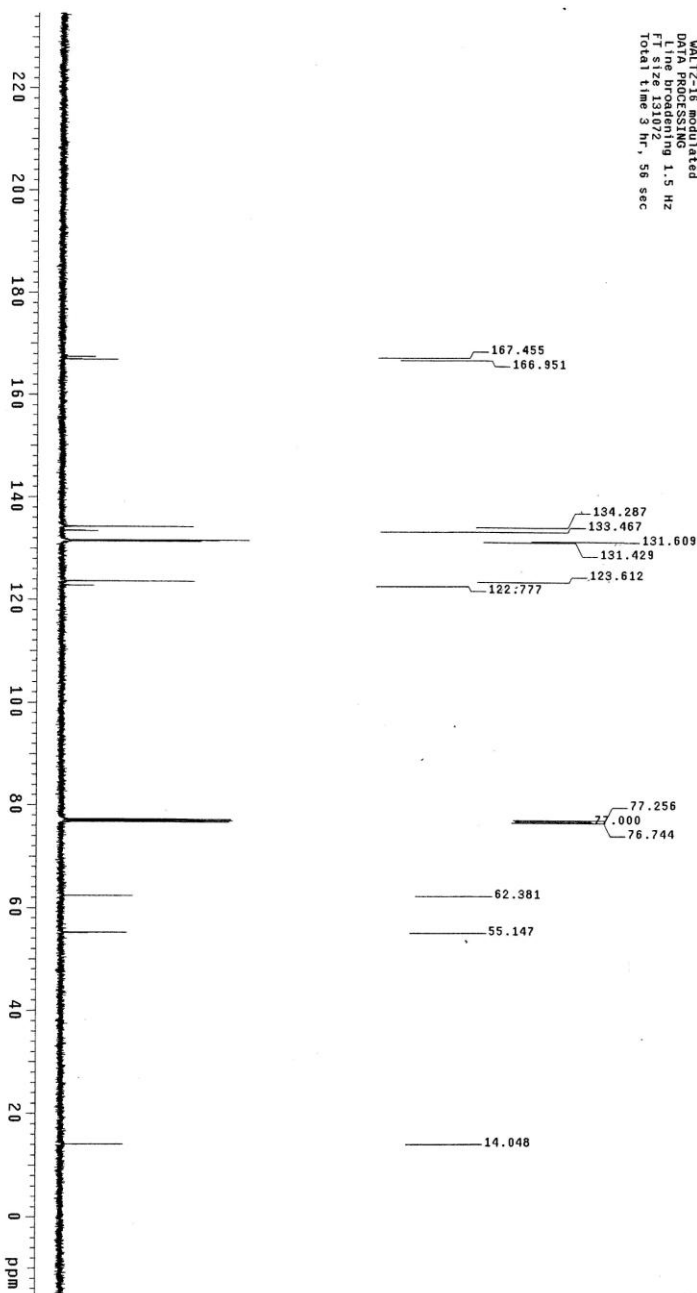

Supplement: c4ra07118b1.pdf [file c4ra07118b1.pdf]
